# Supplementary material for: Comprehensive analysis of an immune-related ceRNA network in identifying a novel lncRNA signature as a prognostic biomarker for hepatocellular carcinoma
Source: PubMed Central journal article supplement (PMC8312417; doi:10.18632/aging.203250), 2021-07-08
Supplement: aging-13-203250-s004.pdf [file aging-13-203250-s004.pdf]

**Supplementary Table 3. List of genes to build the immune-related ceRNA network in HCC.**

| 59DElncRNA  | 26DEmRNA | 21DEmiRNA    |
|-------------|----------|--------------|
| AL591845.1  | NR4A2    | hsa-miR-93   |
| C1orf147    | TPM2     | hsa-miR-372  |
| C2orf48     | JAG2     | hsa-miR-373  |
| SERHL       | ESR1     | hsa-miR-195  |
| AC087289.1  | IL11     | hsa-miR-424  |
| AC012074.1  | LYZ      | hsa-miR-519d |
| C10orf91    | BMP8B    | hsa-miR-182  |
| WDFY3-AS2   | FOS      | hsa-miR-214  |
| COL18A1-AS1 | IGF1     | hsa-miR-338  |
| C9orf163    | TGFBR3   | hsa-miR-137  |
| LINC00173   | STC2     | hsa-miR-141  |
| SNHG12      | TGFB2    | hsa-miR-204  |
| AC016586.1  | THBS1    | hsa-miR-211  |
| AL359878.1  | BDNF     | hsa-miR-21   |
| C1orf220    | IL1B     | hsa-miR-183  |
| UCA1        | LTF      | hsa-miR-206  |
| AC010336.2  | PLXNA1   | hsa-miR-301b |
| AC011481.1  | ULBP2    | hsa-miR-454  |
| MCM3AP-AS1  | CMTM4    | hsa-miR-217  |
| AC016773.1  | KLRD1    | hsa-miR-221  |
| MIR181A2HG  | PTGS2    | hsa-miR-222  |
| WARS2-IT1   | LEFTY1   |              |
| HTR2A-AS1   | ADM      |              |
| ZNF32-AS1   | NTF3     |              |
| LINC00323   | MAP2K1   |              |
| LENG8-AS1   | IL12A    |              |
| GUSBP11     |          |              |
| CCDC26      |          |              |
| UBE2Q1-AS1  |          |              |
| STEAP3-AS1  |          |              |
| DSCR9       |          |              |
| ZNF32-AS2   |          |              |
| DNM3OS      |          |              |
| MAGI2-AS3   |          |              |
| LINC00402   |          |              |
| LINC00494   |          |              |
| RBMS3-AS3   |          |              |
| MIR600HG    |          |              |
| ZBTB40-IT1  |          |              |
| DGUOK-AS1   |          |              |
| KLF7-IT1    |          |              |
| AC009121.1  |          |              |
| MYLK-AS1    |          |              |
| AP001347.1  |          |              |
| ADAMTS9-AS1 |          |              |
| ADAMTS9-AS2 |          |              |
| AC078778.1  |          |              |
| SNHG3       |          |              |

---

MCCC1-AS1  
AL133367.1  
SNHG6  
AC147651.1  
SNHG1  
AL139385.1  
AC040173.1  
KCNQ1OT1  
DIO3OS  
LINC00519  
FBXL19-AS1

---
