# Supplementary material for: Comprehensive analysis of an immune-related ceRNA network in identifying a novel lncRNA signature as a prognostic biomarker for hepatocellular carcinoma
Source: Aging (Albany NY). 2021 Jul 8;13(13):17607–28. doi: 10.18632/aging.203250 (PMC8312417; doi:10.18632/aging.203250)
Supplement: Supplementary Table 1 [file aging-13-203250-s002.xlsx]

## Sheet: Differentially Expressed Genes
Supplementary Table 1. List of differentially expressed genes to build the ceRNA network in HCC.
331DElncRNA	242DEmRNA	29DEmiRNA
IGF2-AS	CCDC71L	hsa-miR-93
AL591845.1	SYDE2	hsa-miR-519d
FAM182A	PSAT1	hsa-miR-214
LINC00470	FASN	hsa-miR-338
PART1	NRBF2	hsa-miR-670
C1orf147	RET	hsa-miR-372
C2orf48	KLF13	hsa-miR-373
AC009065.1	MSH2	hsa-miR-96
AC021066.1	ZEB2	hsa-miR-195
SERHL	KIF23	hsa-miR-424
CCDC13-AS1	FOXL2	hsa-miR-182
C20orf166-AS1	CHAF1A	hsa-miR-216b
C15orf54	LRRK2	hsa-miR-508
AC009336.1	SOWAHC	hsa-miR-141
AC127496.1	MATR3	hsa-miR-205
AL357153.1	CBX2	hsa-miR-506
AL033381.1	ELOVL7	hsa-miR-216a
MIR7-3HG	ETS2	hsa-miR-301b
AP002478.1	KLHL23	hsa-miR-454
AC087289.1	EPHA7	hsa-miR-206
AC012074.1	KPNA2	hsa-miR-204
AC020907.1	GLUL	hsa-miR-211
C9orf106	FIGNL1	hsa-miR-21
C10orf91	POU3F2	hsa-miR-31
AC024563.1	PFKP	hsa-miR-137
LINC00304	HOXA9	hsa-miR-183
AC022148.1	PAX3	hsa-miR-221
WDFY3-AS2	CLSPN	hsa-miR-222
AC123768.1	KLF11	hsa-miR-217
FER1L6-AS1	HOXA10
FAM87A	MAP3K9
WT1-AS	SUCO
AC010336.1	TBXA2R
COL18A1-AS1	CPEB3
AC100791.1	FOXF2
AC132872.1	E2F1
LINC00308	PIM1
LINC00482	CBFA2T3
C17orf82	TPM2
LINC00221	RBM20
TCL6	TRPC3
C9orf163	FAM46C
LINC00173	HAS2
AC087392.1	RBMS3
LINC00336	KLRD1
C17orf102	KIF5C
SNHG12	MCC
FLVCR1-AS1	GPC5
AC012615.1	GPR137C
AL590822.1	DCDC2
AC020907.2	PCDHA2
AC061975.6	SLC22A6
AC061975.7	E2F5
AL512652.1	ZCCHC24
LINC00501	RACGAP1
LINC00272	ACSL4
TDRG1	ARL2
PSORS1C3	CCSAP
HCG9	DLX4
AC010536.1	RASGEF1B
AC016586.1	SHISA6
TTLL10-AS1	TFAP2C
MUC19	ATAD2
ADARB2-AS1	LAMC1
AL359878.1	ANKRD29
FAM99B	IL12A
FAM99A	EIF5A2
AC092117.1	CCDC137
AC005841.1	HOXA3
AC006305.1	LEFTY1
AP000525.1	DUSP6
HCG27	ELAVL2
AC061975.8	PTPN14
AC084262.1	HOXC13
C1orf220	FOXO1
AC022498.1	PTGS2
AL163952.1	LRRC1
UCA1	RRM2
AC005544.1	SOCS6
ST7-OT4	OSBPL3
AC010336.2	IL1B
LINC00488	EGLN3
MEG3	CDCA4
AC007952.2	WEE1
AC011481.1	RGS6
AC003102.1	ULBP2
MCM3AP-AS1	SIK1
AP001619.1	MCM4
LINC00189	ESR1
AL157788.1	SEMA7A
AL357060.1	PLXNA1
LY86-AS1	MAP2K3
AC073263.1	SPRY2
AC016773.1	SQLE
IGBP1-AS2	ZNF711
AL117190.1	FOXK1
AC012050.1	NPTX1
AC124861.1	JPH1
AL157904.1	CEP55
AL359815.1	PPP1R3B
C1orf229	RASEF
C7orf71	LDLR
AL356310.1	SALL3
AL355388.1	MAP2K1
AC096642.1	AGO2
AL513123.1	CENPQ
AC027307.1	RRAGD
CLDN10-AS1	SQSTM1
LINC00473	KIAA1549
DSCR4-IT1	PDLIM5
LGALS8-AS1	CITED2
LINC00114	OLR1
MIR181A2HG	FZD6
TCEAL3-AS1	TM4SF20
LINC00466	KLF10
WARS2-IT1	RS1
STK24-AS1	ZWINT
PRKAR2A-AS1	ITGA2
HTR2A-AS1	PABPC4L
TMEM72-AS1	DEPDC1
LINC00184	LTF
LINC00237	CCNE1
SFTA1P	TMEM151B
TTTY16	KBTBD11
ZNF385D-AS1	CMTM4
MTOR-AS1	RAB34
RUSC1-AS1	FOXQ1
PCA3	CCNB1
ABHD11-AS1	LZTS1
PRICKLE2-AS3	SAMD5
AC127496.3	NR4A2
ZNF32-AS1	CCNF
GRM7-AS3	FGF9
LINC00351	SAMD12
ADIPOQ-AS1	PCDHA3
LINC00323	STC2
SPANXA2-OT1	DLG5
LENG8-AS1	TKT
AC079341.1	FOS
LINC00348	SPG20
BSN-AS2	CHST4
LINC00454	H2AFZ
MIS18A-AS1	ZNF257
LINC00310	COL5A3
SOX21-AS1	MYBL1
LINC00355	POLQ
AL713998.1	FAXC
FAM66A	SOX4
AC108134.2	SEMA4F
GUSBP11	PRKAA2
LMO7-AS1	CSMD1
HOTAIR	PCDHA7
SRGAP3-AS2	NETO2
AC040934.1	PABPC1
HCG22	SNAI2
PCDH9-AS2	HOXC8
AC022098.2	KIAA1549L
HCG23	ARHGEF26
CCDC26	LYZ
KCNQ5-AS1	PLAG1
LINC00200	FUT1
LINC00452	FRMD6
SACS-AS1	PNRC1
UBE2Q1-AS1	SLC7A11
EMX2OS	AHNAK2
STEAP3-AS1	MCL1
DOCK9-AS1	GJB7
FGF12-AS2	DACH1
LINC00443	NOVA1
AC008738.2	ADM
LINC00159	ZNF99
DSCR9	THBS1
ERVMER61-1	BDNF
ZNF32-AS2	ABCB9
HM13-AS1	CDC25A
DNM3OS	MYO19
LINC00332	GNAL
AL161645.1	E2F7
LINC00160	TRIB1
LINC00326	C1QTNF3
FARP1-AS1	JAG2
MIR137HG	ALPL
FGF12-AS1	SLC16A9
WASIR2	EDIL3
DLX6-AS1	LEFTY2
SLC6A1-AS1	PCDHA5
BPESC1	PBK
AC037487.1	ADCY6
HCG25	EGR2
LINC00327	E2F2
SNHG7	SPATS2
ERVH48-1	CHEK1
DSCR10	LPCAT1
LINC00460	ACSL1
LINC00462	CCL20
POU6F2-AS2	BMP8B
DDX39B-AS1	ABCD1
LINC00229	RHOBTB1
FAM74A6	PLXDC1
AC092171.1	SLC1A1
MAGI2-AS3	SLC35D1
LINC00444	NTF3
GAS5	ANKRD52
FAM83C-AS1	FAM71F2
EPN2-AS1	CHST6
LINC00402	PCDHA1
LINC00494	IGF1
LINC00484	FOXD4
LINC00345	GABARAPL1
SRGAP3-AS4	FOXD4L1
AC012379.1	TGFB2
TSPEAR-AS1	EPHA2
TM4SF19-AS1	CDC37L1
RBMS3-AS3	OSR1
LINC00479	PRDM16
GPC6-AS1	LUZP2
CR381653.1	EPB41L4B
AC006372.1	TGFBR3
MTUS2-AS2	SFRP1
MIR600HG	PHF19
ZBTB40-IT1	AXIN2
CAMTA1-IT1	PCDHA4
FRY-AS1	SELE
LINC00316	KIAA2022
P4HA2-AS1	SLC29A2
LINC00211	MBNL2
AL137798.1	PROK2
LINC00322	GINS4
DGUOK-AS1	SATB1
KLF7-IT1	EZH2
AL589947.1	IL11
AC009121.1	UNKL
AC011363.1	CYP1B1
CLRN1-AS1	PCDHA6
AC073342.1	MAP1B
AL136307.1	G6PD
AC112721.1	SCAMP5
CADM2-AS1	VLDLR
MYLK-AS1	SPRYD4
AL596188.1	FAM46A
AC011374.1	CPA4
AL592211.1	PGP
AL162427.1
AC005355.1
AC114489.1
AC097717.1
AC008434.1
AL356056.1
AL118511.1
AL589765.1
AP001830.1
TM4SF1-AS1
LSAMP-AS1
AP001347.1
ADAMTS9-AS1
AL359541.1
AC096637.1
ADAMTS9-AS2
AC078778.1
AC090821.1
AC012640.1
CECR3
SNHG3
AC064836.2
AC025594.2
AL353803.1
AC004034.1
AC063962.1
AL139002.1
ARHGEF26-AS1
LINC00359
FGF14-IT1
PTPRVP
MCCC1-AS1
AL133367.1
AC073352.1
AC010149.1
AC025431.1
HOTTIP
AC011453.1
AC068756.1
AC092422.1
AP000553.1
AC099778.1
CRNDE
SNHG6
LINC00535
LINC00504
AL139147.1
GDNF-AS1
OXCT1-AS1
FAM138E
PVT1
ARHGEF38-IT1
MYLK-AS2
AC128709.1
LINC00491
HULC
AC078993.1
AC147651.1
NRG1-IT1
GRM5-AS1
RRM1-AS1
AC005013.1
SNHG1
AC005618.1
RMST
AL139385.1
LINC00346
AC093734.1
AC019294.2
AL008733.1
AL354707.1
LINC00508
AC040173.1
AL021707.2
NOVA1-AS1
LINC00485
MEG8
KCNQ1OT1
DIO3OS
LINC00520
LINC00519
LINC00524
ACTN1-AS1
LINC00517
LINC00052
PWRN1
LINC00261
PWRN2
FBXL19-AS1
