# Supplementary material for: Comprehensive analysis of an immune-related ceRNA network in identifying a novel lncRNA signature as a prognostic biomarker for hepatocellular carcinoma
Source: Aging (Albany NY). 2021 Jul 8;13(13):17607–28. doi: 10.18632/aging.203250 (PMC8312417; doi:10.18632/aging.203250)
Supplement: Supplementary Table 2 [file aging-13-203250-s003.xlsx]

## Sheet: Table S2-immune-related lncRNA
Supplementary Table 2. List of immune-related lncRNAs in ceRNA network of HCC.
immuneGene	lncRNA	cor	pvalue	Regulation
KCNH2	IGF2-AS	0.433001	1.59657e-18	postive
ROBO2	IGF2-AS	0.440713	3.33434e-19	postive
BMP7	IGF2-AS	0.413956	6.45776e-17	postive
IGF2	IGF2-AS	0.917724	3.10735e-151	postive
FGFR3	IGF2-AS	0.414276	6.07998e-17	postive
GLP1R	IGF2-AS	0.457586	9.39965e-21	postive
CD1A	AL591845.1	0.412515	8.46392e-17	postive
CREB1	AL591845.1	0.443214	1.98903e-19	postive
NFYA	AL591845.1	0.418696	2.62794e-17	postive
RFXAP	AL591845.1	0.411921	9.45801e-17	postive
PSME3	AL591845.1	0.417539	3.27708e-17	postive
IFI30	AL591845.1	0.496486	1.13412e-24	postive
TRPC4AP	AL591845.1	0.422492	1.26587e-17	postive
ULBP1	AL591845.1	0.454813	1.71322e-20	postive
TMSB10	AL591845.1	0.435772	9.1369e-19	postive
S100A6	AL591845.1	0.459731	5.88673e-21	postive
S100A11	AL591845.1	0.503642	1.89516e-25	postive
LMBR1L	AL591845.1	0.491206	4.13395e-24	postive
TMSB15B	AL591845.1	0.407876	2.00415e-16	postive
S100A14	AL591845.1	0.420161	1.98444e-17	postive
ZC3HAV1L	AL591845.1	0.439454	4.3174e-19	postive
TGFB1	AL591845.1	0.458638	7.47489e-21	postive
NOD2	AL591845.1	0.425615	6.8943e-18	postive
PLAU	AL591845.1	0.426261	6.07483e-18	postive
IL1B	AL591845.1	0.404092	4.00892e-16	postive
IRF3	AL591845.1	0.408438	1.80683e-16	postive
CRABP2	AL591845.1	0.5023	2.65892e-25	postive
DUOX1	AL591845.1	0.420454	1.87603e-17	postive
PML	AL591845.1	0.420687	1.79385e-17	postive
ZYX	AL591845.1	0.458208	8.20944e-21	postive
VEGFA	AL591845.1	0.432839	1.64926e-18	postive
IKBKE	AL591845.1	0.454248	1.93465e-20	postive
NOD1	AL591845.1	0.518736	3.77875e-27	postive
MAPK3	AL591845.1	0.438114	5.67703e-19	postive
TRAF3	AL591845.1	0.48794	9.0969e-24	postive
TPM2	AL591845.1	0.434713	1.13139e-18	postive
NEO1	AL591845.1	0.403492	4.47096e-16	postive
SRC	AL591845.1	0.431371	2.21168e-18	postive
ELAVL1	AL591845.1	0.434906	1.08831e-18	postive
SP1	AL591845.1	0.445878	1.14211e-19	postive
DMBT1	AL591845.1	0.41951	2.24858e-17	postive
EED	AL591845.1	0.477589	1.0489e-22	postive
CSK	AL591845.1	0.40169	6.19721e-16	postive
KCNH2	AL591845.1	0.447302	8.47173e-20	postive
CLDN4	AL591845.1	0.402934	4.94834e-16	postive
SYTL1	AL591845.1	0.4703	5.58642e-22	postive
DDX17	AL591845.1	0.448439	6.6687e-20	postive
2021-09-07	AL591845.1	0.440908	3.20344e-19	postive
MAP2K1	AL591845.1	0.42486	7.98974e-18	postive
ABCC4	AL591845.1	0.405886	2.88916e-16	postive
HDAC1	AL591845.1	0.48786	9.27361e-24	postive
VIM	AL591845.1	0.425434	7.14196e-18	postive
AGER	AL591845.1	0.5719	7.2309e-34	postive
UNC93B1	AL591845.1	0.452536	2.79303e-20	postive
ACTG1	AL591845.1	0.441338	2.93151e-19	postive
CXCR4	AL591845.1	0.402235	5.61628e-16	postive
FGR	AL591845.1	0.421676	1.48224e-17	postive
SYK	AL591845.1	0.411595	1.00528e-16	postive
VAV3	AL591845.1	0.406445	2.60797e-16	postive
RAC1	AL591845.1	0.444827	1.42245e-19	postive
PPP3CB	AL591845.1	0.406378	2.63989e-16	postive
NFATC1	AL591845.1	0.417393	3.36963e-17	postive
NFATC2	AL591845.1	0.412309	8.79701e-17	postive
NFATC4	AL591845.1	0.468797	7.84759e-22	postive
CARD11	AL591845.1	0.43015	2.8198e-18	postive
BCL10	AL591845.1	0.454809	1.71478e-20	postive
NFKBIE	AL591845.1	0.416149	4.26742e-17	postive
PTPN6	AL591845.1	0.453559	2.24331e-20	postive
SEMA3C	AL591845.1	0.48628	1.35411e-23	postive
SEMA4A	AL591845.1	0.482582	3.25888e-23	postive
SEMA4C	AL591845.1	0.507896	6.41186e-26	postive
SEMA4D	AL591845.1	0.525282	6.50277e-28	postive
SEMA5B	AL591845.1	0.405116	3.32616e-16	postive
SEMA6A	AL591845.1	0.479475	6.76022e-23	postive
SLIT1	AL591845.1	0.497813	8.16388e-25	postive
EDNRA	AL591845.1	0.412736	8.12049e-17	postive
PLAUR	AL591845.1	0.518409	4.12155e-27	postive
PLXNA1	AL591845.1	0.573386	4.50212e-34	postive
PLXNA3	AL591845.1	0.533679	6.43065e-29	postive
PLXND1	AL591845.1	0.452831	2.62227e-20	postive
PTAFR	AL591845.1	0.430098	2.84895e-18	postive
ARTN	AL591845.1	0.534716	4.81063e-29	postive
BMP8A	AL591845.1	0.509482	4.26412e-26	postive
CLCF1	AL591845.1	0.431694	2.07336e-18	postive
CLEC11A	AL591845.1	0.424334	8.85231e-18	postive
CMTM1	AL591845.1	0.422541	1.25399e-17	postive
CMTM3	AL591845.1	0.503216	2.11071e-25	postive
CMTM4	AL591845.1	0.521231	1.94098e-27	postive
CMTM7	AL591845.1	0.426893	5.36572e-18	postive
CSF1	AL591845.1	0.402418	5.43244e-16	postive
FGF11	AL591845.1	0.416287	4.15781e-17	postive
GDF11	AL591845.1	0.430779	2.48827e-18	postive
GNRH1	AL591845.1	0.531971	1.03502e-28	postive
GPI	AL591845.1	0.407686	2.07551e-16	postive
IL11	AL591845.1	0.483409	2.6804e-23	postive
INHA	AL591845.1	0.407314	2.22274e-16	postive
INSL3	AL591845.1	0.410512	1.22999e-16	postive
JAG1	AL591845.1	0.426408	5.90213e-18	postive
JAG2	AL591845.1	0.433321	1.49728e-18	postive
LIF	AL591845.1	0.431058	2.35393e-18	postive
NRG3	AL591845.1	0.516798	6.31626e-27	postive
OSM	AL591845.1	0.425437	7.13834e-18	postive
PGF	AL591845.1	0.434434	1.19692e-18	postive
PTHLH	AL591845.1	0.45741	9.76662e-21	postive
QRFP	AL591845.1	0.463646	2.48372e-21	postive
RABEP2	AL591845.1	0.549999	5.92498e-31	postive
SCG2	AL591845.1	0.438899	4.83662e-19	postive
TGFA	AL591845.1	0.486943	1.15567e-23	postive
TNFSF15	AL591845.1	0.462195	3.42469e-21	postive
TXLNA	AL591845.1	0.413974	6.43548e-17	postive
VEGFB	AL591845.1	0.450591	4.22786e-20	postive
BMPR1B	AL591845.1	0.432462	1.77859e-18	postive
BRD8	AL591845.1	0.413706	6.76821e-17	postive
CRLF1	AL591845.1	0.440305	3.62571e-19	postive
CRLF3	AL591845.1	0.441154	3.04481e-19	postive
CSF3R	AL591845.1	0.420545	1.84354e-17	postive
EPOR	AL591845.1	0.466411	1.34139e-21	postive
FGFR1	AL591845.1	0.425126	7.5845e-18	postive
GIPR	AL591845.1	0.571111	9.28716e-34	postive
GLP2R	AL591845.1	0.403053	4.84258e-16	postive
HTR3A	AL591845.1	0.43545	9.75002e-19	postive
IFNGR2	AL591845.1	0.496601	1.10246e-24	postive
IGF1R	AL591845.1	0.509448	4.3014e-26	postive
IL17RD	AL591845.1	0.425546	6.98734e-18	postive
IL20RA	AL591845.1	0.426649	5.6295e-18	postive
IL27RA	AL591845.1	0.451885	3.20979e-20	postive
IL4R	AL591845.1	0.415884	4.48753e-17	postive
IL9R	AL591845.1	0.412583	8.35594e-17	postive
MC1R	AL591845.1	0.449049	5.86173e-20	postive
NR2C1	AL591845.1	0.465484	1.65017e-21	postive
OPRL1	AL591845.1	0.456012	1.32245e-20	postive
OXTR	AL591845.1	0.486203	1.37911e-23	postive
PPARD	AL591845.1	0.4783	8.89175e-23	postive
RARG	AL591845.1	0.434541	1.17137e-18	postive
SCTR	AL591845.1	0.420051	2.02693e-17	postive
SDC3	AL591845.1	0.461385	4.09424e-21	postive
THRA	AL591845.1	0.428162	4.17944e-18	postive
TNFRSF11A	AL591845.1	0.462783	3.00698e-21	postive
TNFRSF21	AL591845.1	0.438269	5.50063e-19	postive
TNFRSF25	AL591845.1	0.400821	7.24916e-16	postive
TUBB3	AL591845.1	0.584636	1.15323e-35	postive
LAT	AL591845.1	0.454988	1.64959e-20	postive
PLCG1	AL591845.1	0.41688	3.71511e-17	postive
GRB2	AL591845.1	0.448897	6.05397e-20	postive
NCK2	AL591845.1	0.546305	1.75094e-30	postive
PAK2	AL591845.1	0.425131	7.5781e-18	postive
PAK4	AL591845.1	0.503916	1.76837e-25	postive
PAK6	AL591845.1	0.419366	2.31158e-17	postive
CDC42	AL591845.1	0.407375	2.19812e-16	postive
CBL	AL591845.1	0.490603	4.78529e-24	postive
CDK4	AL591845.1	0.452251	2.96813e-20	postive
PCSK1	PART1	0.4172	3.49529e-17	postive
CCR3	PART1	0.486058	1.42779e-23	postive
GIP	PART1	0.55309	2.36884e-31	postive
CD1A	C1orf147	0.441722	2.70835e-19	postive
CREB1	C1orf147	0.551247	4.0968e-31	postive
CTSE	C1orf147	0.435058	1.05551e-18	postive
CTSS	C1orf147	0.456571	1.17183e-20	postive
FCER1G	C1orf147	0.421517	1.52845e-17	postive
HLA-DMB	C1orf147	0.409298	1.54096e-16	postive
ICAM1	C1orf147	0.49159	3.76571e-24	postive
LTA	C1orf147	0.417605	3.23595e-17	postive
CIITA	C1orf147	0.513322	1.57385e-26	postive
NFYA	C1orf147	0.47853	8.42765e-23	postive
RFX5	C1orf147	0.46039	5.09498e-21	postive
RFXAP	C1orf147	0.503277	2.07832e-25	postive
TAP1	C1orf147	0.454113	1.99153e-20	postive
AP3B1	C1orf147	0.400232	8.05917e-16	postive
PSME3	C1orf147	0.422881	1.17406e-17	postive
IFI30	C1orf147	0.538698	1.56319e-29	postive
TRPC4AP	C1orf147	0.420145	1.99079e-17	postive
ULBP3	C1orf147	0.401952	5.91052e-16	postive
UBR1	C1orf147	0.407596	2.11035e-16	postive
CXCL5	C1orf147	0.424544	8.49678e-18	postive
CXCL1	C1orf147	0.43226	1.85179e-18	postive
CXCL3	C1orf147	0.479511	6.70292e-23	postive
MMP12	C1orf147	0.441947	2.58538e-19	postive
TMSB4X	C1orf147	0.444763	1.44146e-19	postive
ZC3HAV1	C1orf147	0.407046	2.33508e-16	postive
S100B	C1orf147	0.440515	3.47288e-19	postive
S100A6	C1orf147	0.407684	2.07632e-16	postive
PGLYRP4	C1orf147	0.42699	5.2641e-18	postive
S100A11	C1orf147	0.488378	8.18789e-24	postive
S100A3	C1orf147	0.402141	5.71183e-16	postive
LMBR1L	C1orf147	0.48066	5.1222e-23	postive
TMSB15B	C1orf147	0.416447	4.03313e-17	postive
S100Z	C1orf147	0.466412	1.34124e-21	postive
ZC3HAV1L	C1orf147	0.413941	6.47558e-17	postive
TGFB1	C1orf147	0.430053	2.87486e-18	postive
MMP9	C1orf147	0.443992	1.69257e-19	postive
TLR4	C1orf147	0.407939	1.9809e-16	postive
NFKB1	C1orf147	0.446942	9.13796e-20	postive
APOBEC3G	C1orf147	0.456791	1.11711e-20	postive
NOD2	C1orf147	0.5498	6.28438e-31	postive
TLR2	C1orf147	0.473724	2.559e-22	postive
PLAU	C1orf147	0.546981	1.43744e-30	postive
IL1B	C1orf147	0.477273	1.12882e-22	postive
FABP5	C1orf147	0.40838	1.82624e-16	postive
TNF	C1orf147	0.455787	1.3885e-20	postive
MAPK1	C1orf147	0.430031	2.88725e-18	postive
PML	C1orf147	0.527024	4.04606e-28	postive
CYBB	C1orf147	0.484127	2.26073e-23	postive
ISG20L2	C1orf147	0.426963	5.29296e-18	postive
DUOX2	C1orf147	0.403093	4.80699e-16	postive
STAT1	C1orf147	0.468592	8.2186e-22	postive
IRF1	C1orf147	0.448068	7.21146e-20	postive
IL15	C1orf147	0.437589	6.31873e-19	postive
TLR7	C1orf147	0.487384	1.03974e-23	postive
VEGFA	C1orf147	0.453825	2.11896e-20	postive
IKBKE	C1orf147	0.62024	3.9122e-41	postive
TNFAIP3	C1orf147	0.434733	1.12693e-18	postive
F2R	C1orf147	0.403052	4.84311e-16	postive
ITGAV	C1orf147	0.468283	8.81149e-22	postive
CCR6	C1orf147	0.409565	1.46648e-16	postive
IL12B	C1orf147	0.400043	8.33702e-16	postive
TLR8	C1orf147	0.429741	3.0584e-18	postive
EIF2AK2	C1orf147	0.45411	1.99318e-20	postive
NOD1	C1orf147	0.608156	3.36067e-39	postive
MAPK3	C1orf147	0.413056	7.64805e-17	postive
ADAR	C1orf147	0.413516	7.01416e-17	postive
TYK2	C1orf147	0.419054	2.45419e-17	postive
TRAF3	C1orf147	0.559501	3.42909e-32	postive
NEO1	C1orf147	0.448156	7.07781e-20	postive
TLR1	C1orf147	0.43348	1.45016e-18	postive
MX2	C1orf147	0.46756	1.03671e-21	postive
MSR1	C1orf147	0.414462	5.87063e-17	postive
NFKBIZ	C1orf147	0.513852	1.37019e-26	postive
SRC	C1orf147	0.466569	1.29494e-21	postive
SP1	C1orf147	0.537328	2.30543e-29	postive
TMEM173	C1orf147	0.423939	9.56051e-18	postive
DCK	C1orf147	0.475545	1.68328e-22	postive
EED	C1orf147	0.500797	3.87919e-25	postive
LIMS1	C1orf147	0.463825	2.38738e-21	postive
KLRK1	C1orf147	0.415223	5.08557e-17	postive
IL18	C1orf147	0.441636	2.75711e-19	postive
IFNAR2	C1orf147	0.490307	5.14061e-24	postive
SYTL1	C1orf147	0.460477	4.99794e-21	postive
APOBEC3C	C1orf147	0.471494	4.25862e-22	postive
DDX17	C1orf147	0.527242	3.81152e-28	postive
PTGS2	C1orf147	0.400463	7.73066e-16	postive
2021-09-07	C1orf147	0.486216	1.37503e-23	postive
MAP2K1	C1orf147	0.417841	3.0939e-17	postive
IRF9	C1orf147	0.442821	2.15797e-19	postive
HDAC1	C1orf147	0.436714	7.54854e-19	postive
PLSCR1	C1orf147	0.49366	2.27241e-24	postive
TANK	C1orf147	0.414095	6.29075e-17	postive
PIK3CG	C1orf147	0.474356	2.21334e-22	postive
TBK1	C1orf147	0.467635	1.01937e-21	postive
PDCD1	C1orf147	0.427287	4.96559e-18	postive
FASLG	C1orf147	0.40866	1.73405e-16	postive
VIM	C1orf147	0.401191	6.78091e-16	postive
AGER	C1orf147	0.434605	1.15632e-18	postive
UNC93B1	C1orf147	0.449368	5.47985e-20	postive
CCR8	C1orf147	0.512278	2.06656e-26	postive
CCR5	C1orf147	0.478654	8.18754e-23	postive
CCR1	C1orf147	0.454012	2.03519e-20	postive
CXCR4	C1orf147	0.508461	5.54557e-26	postive
CCR4	C1orf147	0.487117	1.10851e-23	postive
FAM19A3	C1orf147	0.407702	2.06965e-16	postive
IL10	C1orf147	0.428076	4.25075e-18	postive
FGR	C1orf147	0.510823	3.01512e-26	postive
JAK2	C1orf147	0.548143	1.02292e-30	postive
CD86	C1orf147	0.46246	3.22971e-21	postive
HCK	C1orf147	0.469002	7.49292e-22	postive
VDR	C1orf147	0.421124	1.64894e-17	postive
LYN	C1orf147	0.422689	1.2186e-17	postive
SYK	C1orf147	0.536455	2.94967e-29	postive
BTK	C1orf147	0.483052	2.91655e-23	postive
VAV3	C1orf147	0.41446	5.87248e-17	postive
VAV1	C1orf147	0.475023	1.89854e-22	postive
RAC2	C1orf147	0.493641	2.28288e-24	postive
PPP3CB	C1orf147	0.403411	4.53746e-16	postive
NFAT5	C1orf147	0.431844	2.0122e-18	postive
NFATC2	C1orf147	0.469116	7.30216e-22	postive
KRAS	C1orf147	0.475687	1.62902e-22	postive
NRAS	C1orf147	0.457211	1.01972e-20	postive
CARD11	C1orf147	0.521826	1.65477e-27	postive
BCL10	C1orf147	0.541259	7.52806e-30	postive
MALT1	C1orf147	0.443783	1.76754e-19	postive
IKBKB	C1orf147	0.442913	2.11747e-19	postive
NFKBIE	C1orf147	0.433374	1.48128e-18	postive
CR2	C1orf147	0.423311	1.0802e-17	postive
PIK3R5	C1orf147	0.517161	5.73781e-27	postive
PIK3CA	C1orf147	0.435537	9.58121e-19	postive
PIK3CB	C1orf147	0.442414	2.34769e-19	postive
PIK3CD	C1orf147	0.551827	3.44909e-31	postive
AKT3	C1orf147	0.427417	4.84053e-18	postive
INPP5D	C1orf147	0.511114	2.79587e-26	postive
PTPN6	C1orf147	0.515211	9.59581e-27	postive
LILRB3	C1orf147	0.441461	2.85814e-19	postive
RASGRP3	C1orf147	0.40959	1.45989e-16	postive
PRKCB	C1orf147	0.426683	5.59132e-18	postive
SEMA3A	C1orf147	0.41406	6.33264e-17	postive
SEMA3C	C1orf147	0.482621	3.22885e-23	postive
SEMA3E	C1orf147	0.405435	3.13774e-16	postive
SEMA4A	C1orf147	0.547182	1.35558e-30	postive
SEMA4B	C1orf147	0.418949	2.50387e-17	postive
SEMA4C	C1orf147	0.487188	1.08974e-23	postive
SEMA4D	C1orf147	0.591659	1.08772e-36	postive
SEMA5B	C1orf147	0.447852	7.54596e-20	postive
SEMA6A	C1orf147	0.446335	1.03782e-19	postive
SLIT1	C1orf147	0.404166	3.95556e-16	postive
SLIT2	C1orf147	0.400067	8.30168e-16	postive
TNC	C1orf147	0.438775	4.96066e-19	postive
CCRL2	C1orf147	0.426604	5.67872e-18	postive
CXCR3	C1orf147	0.416407	4.06366e-17	postive
CYSLTR2	C1orf147	0.436282	8.23988e-19	postive
EDNRA	C1orf147	0.433346	1.48964e-18	postive
FPR1	C1orf147	0.425579	6.94268e-18	postive
PLAUR	C1orf147	0.546545	1.63251e-30	postive
PLXNA1	C1orf147	0.582129	2.64231e-35	postive
PLXNA3	C1orf147	0.482279	3.50036e-23	postive
PLXNB3	C1orf147	0.412072	9.19516e-17	postive
PLXNC1	C1orf147	0.4087	1.72128e-16	postive
PLXND1	C1orf147	0.46736	1.08436e-21	postive
PTAFR	C1orf147	0.510027	3.70482e-26	postive
ARTN	C1orf147	0.436719	7.54125e-19	postive
BMP8A	C1orf147	0.483642	2.53661e-23	postive
CLCF1	C1orf147	0.408305	1.85172e-16	postive
CMTM1	C1orf147	0.525269	6.52623e-28	postive
CMTM3	C1orf147	0.418731	2.61017e-17	postive
CMTM4	C1orf147	0.430198	2.79301e-18	postive
CMTM6	C1orf147	0.483025	2.93477e-23	postive
CMTM7	C1orf147	0.45213	3.0463e-20	postive
CSF1	C1orf147	0.515078	9.93706e-27	postive
FGF11	C1orf147	0.417409	3.35911e-17	postive
GHRL	C1orf147	0.413485	7.05512e-17	postive
GMFB	C1orf147	0.433007	1.59463e-18	postive
GNRH1	C1orf147	0.442399	2.35473e-19	postive
IL12A	C1orf147	0.468808	7.82821e-22	postive
IL16	C1orf147	0.444397	1.55571e-19	postive
IL7	C1orf147	0.411577	1.00862e-16	postive
JAG1	C1orf147	0.463765	2.41904e-21	postive
KITLG	C1orf147	0.422461	1.27362e-17	postive
LIF	C1orf147	0.484942	1.86279e-23	postive
OSM	C1orf147	0.487536	1.00252e-23	postive
PTHLH	C1orf147	0.420037	2.03228e-17	postive
QRFP	C1orf147	0.426552	5.73784e-18	postive
TGFA	C1orf147	0.444856	1.41395e-19	postive
TNFRSF11B	C1orf147	0.434446	1.19409e-18	postive
TNFSF13	C1orf147	0.509347	4.41552e-26	postive
TNFSF13B	C1orf147	0.489091	6.89629e-24	postive
TNFSF15	C1orf147	0.512226	2.09449e-26	postive
TNFSF18	C1orf147	0.418017	2.99201e-17	postive
TNFSF8	C1orf147	0.46032	5.17338e-21	postive
TXLNA	C1orf147	0.404042	4.04565e-16	postive
ACVR1B	C1orf147	0.442296	2.40559e-19	postive
ACVR2A	C1orf147	0.42922	3.39068e-18	postive
BMPR1A	C1orf147	0.420708	1.78641e-17	postive
BMPR2	C1orf147	0.437925	5.90072e-19	postive
BRD8	C1orf147	0.403535	4.43688e-16	postive
C3AR1	C1orf147	0.404966	3.41825e-16	postive
CRLF3	C1orf147	0.594293	4.42098e-37	postive
CSF1R	C1orf147	0.417545	3.27319e-17	postive
CSF2RA	C1orf147	0.469835	6.2057e-22	postive
CSF2RB	C1orf147	0.534283	5.43163e-29	postive
CSF3R	C1orf147	0.518009	4.58397e-27	postive
EPOR	C1orf147	0.424332	8.85648e-18	postive
GIPR	C1orf147	0.486128	1.4043e-23	postive
HTR3A	C1orf147	0.402478	5.37403e-16	postive
IFNGR2	C1orf147	0.526401	4.79546e-28	postive
IGF1R	C1orf147	0.461415	4.06688e-21	postive
IGF2R	C1orf147	0.405267	3.2356e-16	postive
IL10RA	C1orf147	0.418193	2.8932e-17	postive
IL12RB1	C1orf147	0.476038	1.50223e-22	postive
IL17RA	C1orf147	0.452614	2.74676e-20	postive
IL17RD	C1orf147	0.429564	3.16734e-18	postive
IL21R	C1orf147	0.521396	1.85698e-27	postive
IL27RA	C1orf147	0.432427	1.79082e-18	postive
IL2RA	C1orf147	0.4572	1.02234e-20	postive
IL2RB	C1orf147	0.498017	7.76162e-25	postive
IL2RG	C1orf147	0.464421	2.0912e-21	postive
IL4R	C1orf147	0.457887	8.80453e-21	postive
IL9R	C1orf147	0.507948	6.32616e-26	postive
NR2C1	C1orf147	0.477802	9.98268e-23	postive
NR2C2	C1orf147	0.506467	9.24293e-26	postive
NR2F2	C1orf147	0.412802	8.02085e-17	postive
OPRL1	C1orf147	0.418727	2.61243e-17	postive
OSMR	C1orf147	0.43308	1.57119e-18	postive
PPARD	C1orf147	0.460918	4.53646e-21	postive
PTGER4	C1orf147	0.49975	5.04045e-25	postive
RARG	C1orf147	0.445324	1.28217e-19	postive
SDC3	C1orf147	0.513555	1.48106e-26	postive
TGFBR1	C1orf147	0.496274	1.19508e-24	postive
TNFRSF11A	C1orf147	0.482415	3.38959e-23	postive
TNFRSF13C	C1orf147	0.423638	1.01354e-17	postive
TNFRSF21	C1orf147	0.463586	2.51745e-21	postive
TNFRSF25	C1orf147	0.409789	1.40691e-16	postive
TNFRSF8	C1orf147	0.479967	6.02489e-23	postive
TUBB3	C1orf147	0.447446	8.22031e-20	postive
ITGB2	C1orf147	0.486985	1.14387e-23	postive
PAK1	C1orf147	0.447718	7.76251e-20	postive
LCK	C1orf147	0.426985	5.26983e-18	postive
FCGR3A	C1orf147	0.406233	2.71136e-16	postive
ZAP70	C1orf147	0.424841	8.01847e-18	postive
LCP2	C1orf147	0.534633	4.92351e-29	postive
LAT	C1orf147	0.540517	9.30911e-30	postive
PLCG1	C1orf147	0.422579	1.24488e-17	postive
GRB2	C1orf147	0.43666	7.63147e-19	postive
CASP3	C1orf147	0.496857	1.03468e-24	postive
CD3E	C1orf147	0.404178	3.94657e-16	postive
CD3G	C1orf147	0.473256	2.84832e-22	postive
PTPRC	C1orf147	0.526876	4.21208e-28	postive
ITK	C1orf147	0.442221	2.44332e-19	postive
NCK1	C1orf147	0.436694	7.5793e-19	postive
NCK2	C1orf147	0.503749	1.84465e-25	postive
PAK2	C1orf147	0.514346	1.20414e-26	postive
PAK4	C1orf147	0.43372	1.38201e-18	postive
CDC42	C1orf147	0.448268	6.91259e-20	postive
CD28	C1orf147	0.404049	4.04069e-16	postive
ICOS	C1orf147	0.421358	1.57608e-17	postive
CTLA4	C1orf147	0.417114	3.55313e-17	postive
CBL	C1orf147	0.592842	7.2664e-37	postive
CBLB	C1orf147	0.479422	6.8444e-23	postive
CDK4	C1orf147	0.444229	1.61114e-19	postive
RASGRP1	C1orf147	0.520191	2.56375e-27	postive
PRKCQ	C1orf147	0.401669	6.22053e-16	postive
MICB	C2orf48	0.406644	2.51412e-16	postive
NFYC	C2orf48	0.501425	3.31374e-25	postive
PSMD11	C2orf48	0.407326	2.21778e-16	postive
PSMD13	C2orf48	0.400865	7.19113e-16	postive
RFXAP	C2orf48	0.416991	3.63745e-17	postive
RFXANK	C2orf48	0.412241	8.90868e-17	postive
ISG20L2	C2orf48	0.411942	9.42101e-17	postive
CACYBP	C2orf48	0.441814	2.65769e-19	postive
MAPK3	C2orf48	0.479317	7.01356e-23	postive
PPP4C	C2orf48	0.416603	3.91529e-17	postive
HMGB1	C2orf48	0.4152	5.1077e-17	postive
HDAC1	C2orf48	0.440216	3.69272e-19	postive
BIRC5	C2orf48	0.659417	5.02355e-48	postive
NRAS	C2orf48	0.412328	8.76583e-17	postive
NFKBIE	C2orf48	0.403043	4.85118e-16	postive
IL12A	C2orf48	0.417979	3.01342e-17	postive
BRD8	C2orf48	0.420971	1.69822e-17	postive
CRLF3	C2orf48	0.401366	6.57089e-16	postive
NR2C1	C2orf48	0.423769	9.88174e-18	postive
TNFRSF13C	C2orf48	0.406767	2.45783e-16	postive
PAK4	C2orf48	0.409387	1.51578e-16	postive
WFIKKN1	AC009065.1	0.425437	7.13768e-18	postive
LTB4R	AC009065.1	0.402166	5.6859e-16	postive
MC1R	AC009065.1	0.405528	3.08484e-16	postive
PSMD1	SERHL	0.416327	4.12622e-17	postive
PSME3	SERHL	0.477791	1.00084e-22	postive
TRPC4AP	SERHL	0.404889	3.46677e-16	postive
MAPK1	SERHL	0.401766	6.11231e-16	postive
PML	SERHL	0.400356	7.88152e-16	postive
ISG20L2	SERHL	0.479308	7.02962e-23	postive
TYK2	SERHL	0.490193	5.2839e-24	postive
TRAF3	SERHL	0.422661	1.22524e-17	postive
ELAVL1	SERHL	0.409185	1.57348e-16	postive
SP1	SERHL	0.4019	5.96631e-16	postive
ECD	SERHL	0.400164	8.15776e-16	postive
RELA	SERHL	0.418959	2.49877e-17	postive
DDX17	SERHL	0.427697	4.58117e-18	postive
HDAC1	SERHL	0.407629	2.09756e-16	postive
AGER	SERHL	0.407599	2.10926e-16	postive
UNC93B1	SERHL	0.437303	6.69729e-19	postive
PPP3CB	SERHL	0.409885	1.38206e-16	postive
SEMA4C	SERHL	0.451295	3.64026e-20	postive
PLXNA1	SERHL	0.501443	3.29916e-25	postive
PLXNB2	SERHL	0.436499	7.88428e-19	postive
CMTM1	SERHL	0.413175	7.47869e-17	postive
CMTM4	SERHL	0.454479	1.84101e-20	postive
HDGF	SERHL	0.446394	1.025e-19	postive
JAG1	SERHL	0.418246	2.86394e-17	postive
BMPR1A	SERHL	0.424736	8.18466e-18	postive
IL17RA	SERHL	0.449496	5.33343e-20	postive
RARG	SERHL	0.425085	7.64661e-18	postive
THRA	SERHL	0.41447	5.86141e-17	postive
SHC1	SERHL	0.490241	5.22385e-24	postive
GRB2	SERHL	0.439645	4.15151e-19	postive
PAK4	SERHL	0.468497	8.39556e-22	postive
CBL	SERHL	0.430632	2.5622e-18	postive
RLN3	CCDC13-AS1	0.417069	3.58348e-17	postive
PLAU	C20orf166-AS1	0.432396	1.80198e-18	postive
CRABP2	C20orf166-AS1	0.408685	1.72616e-16	postive
F2R	C20orf166-AS1	0.403334	4.60139e-16	postive
ELN	C20orf166-AS1	0.460847	4.60834e-21	postive
VIM	C20orf166-AS1	0.408793	1.69191e-16	postive
SEMA3C	C20orf166-AS1	0.448441	6.66602e-20	postive
SLIT2	C20orf166-AS1	0.470936	4.83549e-22	postive
TNC	C20orf166-AS1	0.413118	7.5588e-17	postive
EDNRA	C20orf166-AS1	0.416331	4.12304e-17	postive
BMP5	C20orf166-AS1	0.43035	2.70985e-18	postive
CLEC11A	C20orf166-AS1	0.503166	2.13744e-25	postive
GDF6	C20orf166-AS1	0.419633	2.19626e-17	postive
LTBP2	C20orf166-AS1	0.46558	1.61531e-21	postive
LTBP4	C20orf166-AS1	0.437138	6.92507e-19	postive
NOV	C20orf166-AS1	0.434341	1.21969e-18	postive
OGN	C20orf166-AS1	0.43659	7.74003e-19	postive
TGFB3	C20orf166-AS1	0.446528	9.96629e-20	postive
IL17RD	C20orf166-AS1	0.414315	6.03522e-17	postive
BMP7	AC009336.1	0.408299	1.85364e-16	postive
FGFR3	AC009336.1	0.413247	7.37873e-17	postive
PSMC5	AC127496.1	0.418085	2.95323e-17	postive
PSMD4	AC127496.1	0.402541	5.31292e-16	postive
PSMD8	AC127496.1	0.41372	6.75088e-17	postive
RFXANK	AC127496.1	0.478158	9.18926e-23	postive
ADRM1	AC127496.1	0.406618	2.52644e-16	postive
DAXX	AC127496.1	0.407426	2.17748e-16	postive
MAP2K2	AC127496.1	0.466443	1.33198e-21	postive
IL17RA	AC127496.1	0.401158	6.82148e-16	postive
CCR3	AL357153.1	0.428578	3.85026e-18	postive
NFATC3	AL357153.1	0.405634	3.02555e-16	postive
BMP4	AL357153.1	0.41232	8.7778e-17	postive
CRIM1	AL357153.1	0.413375	7.20245e-17	postive
TNFRSF19	AL357153.1	0.418217	2.87964e-17	postive
TEC	AL357153.1	0.449197	5.68139e-20	postive
MAP3K8	AL357153.1	0.455879	1.36095e-20	postive
PRDX1	AP002478.1	0.529231	2.20838e-28	postive
CCR3	AP002478.1	0.530712	1.4674e-28	postive
GIP	AP002478.1	0.550613	4.94299e-31	postive
SPP1	AP002478.1	0.445569	1.21836e-19	postive
NR0B1	AP002478.1	0.426723	5.54843e-18	postive
CREB1	AC087289.1	0.534526	5.07351e-29	postive
NFYA	AC087289.1	0.494092	2.04418e-24	postive
PSMD5	AC087289.1	0.409199	1.56963e-16	postive
RFXAP	AC087289.1	0.512391	2.00623e-26	postive
AP3B1	AC087289.1	0.42729	4.96281e-18	postive
KIAA0368	AC087289.1	0.400484	7.70167e-16	postive
TRPC4AP	AC087289.1	0.409621	1.4515e-16	postive
UBR1	AC087289.1	0.472231	3.6007e-22	postive
LMBR1L	AC087289.1	0.523649	1.01248e-27	postive
MAPK1	AC087289.1	0.509665	4.06768e-26	postive
ISG20L2	AC087289.1	0.412421	8.61371e-17	postive
VEGFA	AC087289.1	0.537023	2.51315e-29	postive
EIF2AK2	AC087289.1	0.417205	3.49193e-17	postive
NOD1	AC087289.1	0.455139	1.59702e-20	postive
MAPK8	AC087289.1	0.472076	3.73029e-22	postive
TYK2	AC087289.1	0.48851	7.93285e-24	postive
AHNAK	AC087289.1	0.423501	1.04105e-17	postive
NFKBIZ	AC087289.1	0.476629	1.31047e-22	postive
ELAVL1	AC087289.1	0.406237	2.709e-16	postive
SP1	AC087289.1	0.512179	2.12015e-26	postive
ECD	AC087289.1	0.426827	5.43541e-18	postive
SKIV2L	AC087289.1	0.404652	3.62005e-16	postive
DCK	AC087289.1	0.489971	5.57604e-24	postive
TNFRSF10B	AC087289.1	0.403795	4.23166e-16	postive
EED	AC087289.1	0.402997	4.89184e-16	postive
LIMS1	AC087289.1	0.454463	1.84739e-20	postive
BECN1	AC087289.1	0.428694	3.76273e-18	postive
IREB2	AC087289.1	0.469374	6.88918e-22	postive
ILK	AC087289.1	0.434542	1.17129e-18	postive
DDX17	AC087289.1	0.56512	6.08657e-33	postive
2021-09-07	AC087289.1	0.475124	1.85512e-22	postive
MAP2K1	AC087289.1	0.457228	1.01602e-20	postive
LANCL1	AC087289.1	0.433213	1.52988e-18	postive
HMGB1	AC087289.1	0.427792	4.4959e-18	postive
TANK	AC087289.1	0.456476	1.1962e-20	postive
TBK1	AC087289.1	0.484679	1.98326e-23	postive
JAK2	AC087289.1	0.402786	5.08233e-16	postive
NFAT5	AC087289.1	0.513375	1.55237e-26	postive
KRAS	AC087289.1	0.434635	1.14945e-18	postive
NRAS	AC087289.1	0.468786	7.86631e-22	postive
BCL10	AC087289.1	0.427353	4.9015e-18	postive
MALT1	AC087289.1	0.462396	3.27535e-21	postive
IKBKB	AC087289.1	0.435096	1.04743e-18	postive
PIK3CA	AC087289.1	0.494363	1.91303e-24	postive
PIK3CB	AC087289.1	0.407271	2.2403e-16	postive
GSK3B	AC087289.1	0.463934	2.33015e-21	postive
SEMA4C	AC087289.1	0.469378	6.88208e-22	postive
LTB4R2	AC087289.1	0.46761	1.02513e-21	postive
BMP8A	AC087289.1	0.408755	1.70397e-16	postive
CMTM1	AC087289.1	0.487482	1.0156e-23	postive
GMFB	AC087289.1	0.413747	6.71688e-17	postive
GNRH1	AC087289.1	0.422324	1.30781e-17	postive
NODAL	AC087289.1	0.403157	4.7518e-16	postive
ACVR2A	AC087289.1	0.483464	2.64544e-23	postive
BMPR1A	AC087289.1	0.456828	1.1083e-20	postive
BMPR2	AC087289.1	0.432185	1.87984e-18	postive
BRD8	AC087289.1	0.476216	1.44173e-22	postive
CRLF3	AC087289.1	0.538686	1.56869e-29	postive
IGF2R	AC087289.1	0.433036	1.58515e-18	postive
LGR4	AC087289.1	0.421002	1.68822e-17	postive
NR2C1	AC087289.1	0.50722	7.62436e-26	postive
NR2C2	AC087289.1	0.582807	2.1131e-35	postive
TGFBR1	AC087289.1	0.417869	3.07758e-17	postive
PTPN11	AC087289.1	0.49354	2.34011e-24	postive
LAT	AC087289.1	0.408879	1.66519e-16	postive
PLCG1	AC087289.1	0.408153	1.90442e-16	postive
GRB2	AC087289.1	0.462186	3.43093e-21	postive
SOS1	AC087289.1	0.434964	1.07554e-18	postive
SOS2	AC087289.1	0.434977	1.07292e-18	postive
BRAF	AC087289.1	0.49388	2.15314e-24	postive
RAF1	AC087289.1	0.451917	3.1876e-20	postive
PRKCA	AC087289.1	0.440134	3.75519e-19	postive
CASP3	AC087289.1	0.434507	1.17947e-18	postive
NCK1	AC087289.1	0.449767	5.03587e-20	postive
PAK2	AC087289.1	0.404411	3.78268e-16	postive
CBL	AC087289.1	0.483402	2.6849e-23	postive
CBLB	AC087289.1	0.414141	6.23682e-17	postive
CREB1	AC012074.1	0.485615	1.58711e-23	postive
NFYA	AC012074.1	0.477006	1.20074e-22	postive
PSMD5	AC012074.1	0.42286	1.17877e-17	postive
RFXAP	AC012074.1	0.513136	1.65211e-26	postive
TRPC4AP	AC012074.1	0.420701	1.78884e-17	postive
LMBR1L	AC012074.1	0.473439	2.73159e-22	postive
MAVS	AC012074.1	0.462128	3.47541e-21	postive
DUOX1	AC012074.1	0.426605	5.6783e-18	postive
ISG20L2	AC012074.1	0.489477	6.28341e-24	postive
VEGFA	AC012074.1	0.420064	2.02196e-17	postive
IKBKE	AC012074.1	0.449622	5.19302e-20	postive
EIF2AK2	AC012074.1	0.406274	2.69072e-16	postive
CACYBP	AC012074.1	0.419321	2.33165e-17	postive
NOD1	AC012074.1	0.418042	2.97777e-17	postive
TYK2	AC012074.1	0.451063	3.82435e-20	postive
TRAF3	AC012074.1	0.484915	1.87501e-23	postive
SRC	AC012074.1	0.420217	1.96333e-17	postive
ELAVL1	AC012074.1	0.446093	1.09184e-19	postive
SP1	AC012074.1	0.505863	1.07824e-25	postive
EED	AC012074.1	0.521246	1.9333e-27	postive
LIMS1	AC012074.1	0.442921	2.11378e-19	postive
DDX17	AC012074.1	0.499679	5.13169e-25	postive
2021-09-07	AC012074.1	0.428141	4.19697e-18	postive
HDAC1	AC012074.1	0.414762	5.54731e-17	postive
BIRC5	AC012074.1	0.400905	7.13921e-16	postive
AGER	AC012074.1	0.535412	3.95688e-29	postive
RNASE2	AC012074.1	0.405186	3.2837e-16	postive
NFATC2	AC012074.1	0.415398	4.92001e-17	postive
BCL10	AC012074.1	0.407625	2.09909e-16	postive
MALT1	AC012074.1	0.458436	7.81171e-21	postive
SEMA4C	AC012074.1	0.472347	3.50617e-22	postive
SEMA4D	AC012074.1	0.451087	3.8049e-20	postive
PLXNA1	AC012074.1	0.514004	1.31673e-26	postive
PLXND1	AC012074.1	0.406436	2.61191e-16	postive
AMH	AC012074.1	0.423777	9.8663e-18	postive
ARTN	AC012074.1	0.404218	3.9178e-16	postive
CMTM4	AC012074.1	0.428107	4.2253e-18	postive
CMTM7	AC012074.1	0.453277	2.38296e-20	postive
FGF11	AC012074.1	0.421391	1.56612e-17	postive
GNRH1	AC012074.1	0.493839	2.17501e-24	postive
IL11	AC012074.1	0.412117	9.11865e-17	postive
IL12A	AC012074.1	0.436295	8.21827e-19	postive
QRFP	AC012074.1	0.443662	1.81266e-19	postive
BMPR1A	AC012074.1	0.476606	1.3175e-22	postive
CRLF3	AC012074.1	0.482221	3.54899e-23	postive
EPOR	AC012074.1	0.436927	7.22867e-19	postive
IFNGR2	AC012074.1	0.500527	4.15083e-25	postive
IL20RA	AC012074.1	0.423178	1.1084e-17	postive
NR2C1	AC012074.1	0.457486	9.60667e-21	postive
NR2C2	AC012074.1	0.419839	2.111e-17	postive
TGFBR1	AC012074.1	0.418799	2.57681e-17	postive
LAT	AC012074.1	0.421576	1.51112e-17	postive
PLCG1	AC012074.1	0.417784	3.12778e-17	postive
BRAF	AC012074.1	0.411257	1.07072e-16	postive
CASP3	AC012074.1	0.413401	7.16806e-17	postive
NCK2	AC012074.1	0.471274	4.47749e-22	postive
PAK4	AC012074.1	0.562455	1.38742e-32	postive
CBL	AC012074.1	0.516324	7.1581e-27	postive
CDK4	AC012074.1	0.472295	3.54852e-22	postive
CALR	AC020907.1	0.409369	1.52087e-16	postive
SLPI	AC020907.1	0.483435	2.66368e-23	postive
FURIN	AC020907.1	0.454083	2.00467e-20	postive
PTGFR	AC020907.1	0.403842	4.19584e-16	postive
CBLC	AC020907.1	0.430185	2.80042e-18	postive
PLXNA2	C9orf106	0.412971	7.77026e-17	postive
NFYA	C10orf91	0.419754	2.14585e-17	postive
IFI30	C10orf91	0.404577	3.66974e-16	postive
TMSB10	C10orf91	0.452937	2.56341e-20	postive
S100A11	C10orf91	0.424342	8.83806e-18	postive
TGFB1	C10orf91	0.413525	7.00254e-17	postive
FABP5	C10orf91	0.502088	2.80538e-25	postive
LCN15	C10orf91	0.408204	1.88666e-16	postive
IKBKE	C10orf91	0.500837	3.84023e-25	postive
SRC	C10orf91	0.448675	6.34484e-20	postive
DMBT1	C10orf91	0.439813	4.01112e-19	postive
EED	C10orf91	0.405339	3.19312e-16	postive
KCNH2	C10orf91	0.463213	2.73384e-21	postive
HDAC1	C10orf91	0.436251	8.29093e-19	postive
BIRC5	C10orf91	0.408678	1.72842e-16	postive
ACTG1	C10orf91	0.406944	2.37922e-16	postive
NFKBIE	C10orf91	0.408854	1.67317e-16	postive
PIK3R2	C10orf91	0.401936	5.92753e-16	postive
SEMA4D	C10orf91	0.409302	1.53997e-16	postive
SEMA6A	C10orf91	0.413089	7.59959e-17	postive
SLIT1	C10orf91	0.403176	4.73548e-16	postive
PLXNA1	C10orf91	0.506426	9.34159e-26	postive
PLXNA3	C10orf91	0.403815	4.21655e-16	postive
PLXND1	C10orf91	0.412708	8.16264e-17	postive
CMTM3	C10orf91	0.489036	6.98824e-24	postive
CMTM7	C10orf91	0.447875	7.51035e-20	postive
IL12A	C10orf91	0.424308	8.89774e-18	postive
NRG3	C10orf91	0.486766	1.20564e-23	postive
PTHLH	C10orf91	0.429549	3.17666e-18	postive
TNFSF15	C10orf91	0.435341	9.9679e-19	postive
VEGFB	C10orf91	0.412218	8.947e-17	postive
CALCR	C10orf91	0.433154	1.54833e-18	postive
FGFR3	C10orf91	0.459688	5.94221e-21	postive
GIPR	C10orf91	0.490686	4.68933e-24	postive
IFNGR2	C10orf91	0.433939	1.32236e-18	postive
IL20RA	C10orf91	0.496925	1.01736e-24	postive
OPRD1	C10orf91	0.421337	1.58242e-17	postive
SDC3	C10orf91	0.411719	9.82185e-17	postive
SSTR2	C10orf91	0.407311	2.22402e-16	postive
TNFRSF11A	C10orf91	0.410013	1.34965e-16	postive
NCK2	C10orf91	0.474218	2.28443e-22	postive
PAK4	C10orf91	0.4222	1.33959e-17	postive
CDK4	C10orf91	0.410578	1.21505e-16	postive
NCK2	AC022148.1	0.404333	3.83666e-16	postive
CREB1	WDFY3-AS2	0.522216	1.48984e-27	postive
MR1	WDFY3-AS2	0.459189	6.62809e-21	postive
PSMD1	WDFY3-AS2	0.423678	1.00585e-17	postive
RFXAP	WDFY3-AS2	0.435602	9.45481e-19	postive
AP3B1	WDFY3-AS2	0.41496	5.3447e-17	postive
PSME3	WDFY3-AS2	0.432483	1.771e-18	postive
PROCR	WDFY3-AS2	0.405508	3.09604e-16	postive
KIAA0368	WDFY3-AS2	0.458509	7.68825e-21	postive
UBR1	WDFY3-AS2	0.552511	2.81478e-31	postive
ZC3HAV1	WDFY3-AS2	0.428779	3.70024e-18	postive
TINAGL1	WDFY3-AS2	0.433803	1.35914e-18	postive
TLR4	WDFY3-AS2	0.417205	3.49229e-17	postive
NFKB1	WDFY3-AS2	0.565084	6.1557e-33	postive
SLC40A1	WDFY3-AS2	0.503951	1.75275e-25	postive
PLAU	WDFY3-AS2	0.454193	1.95777e-20	postive
DDX58	WDFY3-AS2	0.401757	6.12251e-16	postive
MAPK1	WDFY3-AS2	0.461102	4.35658e-21	postive
PML	WDFY3-AS2	0.461102	4.35656e-21	postive
TRIM5	WDFY3-AS2	0.402634	5.22446e-16	postive
STAT3	WDFY3-AS2	0.479016	7.5248e-23	postive
RNASEL	WDFY3-AS2	0.45337	2.33619e-20	postive
IL15	WDFY3-AS2	0.410749	1.17693e-16	postive
F2R	WDFY3-AS2	0.446767	9.4807e-20	postive
CYLD	WDFY3-AS2	0.472362	3.49435e-22	postive
ITGAV	WDFY3-AS2	0.629076	1.33044e-42	postive
EIF2AK2	WDFY3-AS2	0.436296	8.216e-19	postive
NOD1	WDFY3-AS2	0.483158	2.84417e-23	postive
NEO1	WDFY3-AS2	0.594711	3.82957e-37	postive
AHNAK	WDFY3-AS2	0.417715	3.16911e-17	postive
TLR1	WDFY3-AS2	0.460857	4.59839e-21	postive
TK2	WDFY3-AS2	0.439632	4.16292e-19	postive
LMBR1	WDFY3-AS2	0.49895	6.15441e-25	postive
SP1	WDFY3-AS2	0.495704	1.37533e-24	postive
TMEM173	WDFY3-AS2	0.434696	1.13548e-18	postive
DCK	WDFY3-AS2	0.447446	8.21963e-20	postive
TNFRSF10B	WDFY3-AS2	0.400591	7.55497e-16	postive
LIMS1	WDFY3-AS2	0.566913	3.4811e-33	postive
BECN1	WDFY3-AS2	0.486388	1.31975e-23	postive
JAK1	WDFY3-AS2	0.592729	7.55408e-37	postive
IREB2	WDFY3-AS2	0.472059	3.74453e-22	postive
ILK	WDFY3-AS2	0.409911	1.37547e-16	postive
DDX17	WDFY3-AS2	0.409248	1.55525e-16	postive
2021-09-07	WDFY3-AS2	0.577702	1.12255e-34	postive
MAP2K1	WDFY3-AS2	0.487052	1.12583e-23	postive
LANCL1	WDFY3-AS2	0.4308	2.47812e-18	postive
PLSCR1	WDFY3-AS2	0.490267	5.19024e-24	postive
TANK	WDFY3-AS2	0.542721	4.94635e-30	postive
PIK3CG	WDFY3-AS2	0.464251	2.17186e-21	postive
TBK1	WDFY3-AS2	0.432723	1.68802e-18	postive
PDGFRB	WDFY3-AS2	0.411711	9.83718e-17	postive
VIM	WDFY3-AS2	0.424809	8.06908e-18	postive
LTBP1	WDFY3-AS2	0.430776	2.49007e-18	postive
JAK2	WDFY3-AS2	0.508751	5.14746e-26	postive
PPP3CA	WDFY3-AS2	0.618095	8.74949e-41	postive
PPP3CB	WDFY3-AS2	0.431946	1.97177e-18	postive
PPP3R1	WDFY3-AS2	0.472102	3.70757e-22	postive
NFAT5	WDFY3-AS2	0.507335	7.40422e-26	postive
NFATC1	WDFY3-AS2	0.417465	3.32347e-17	postive
NFATC3	WDFY3-AS2	0.441144	3.05135e-19	postive
BCL10	WDFY3-AS2	0.535346	4.03039e-29	postive
MALT1	WDFY3-AS2	0.431161	2.30594e-18	postive
IKBKB	WDFY3-AS2	0.426312	6.0136e-18	postive
PIK3CA	WDFY3-AS2	0.561668	1.76731e-32	postive
AKT3	WDFY3-AS2	0.539517	1.23823e-29	postive
GSK3B	WDFY3-AS2	0.46265	3.09691e-21	postive
CX3CL1	WDFY3-AS2	0.401588	6.31197e-16	postive
CYR61	WDFY3-AS2	0.461709	3.81158e-21	postive
SBDS	WDFY3-AS2	0.435368	9.91333e-19	postive
SEMA3C	WDFY3-AS2	0.422922	1.16469e-17	postive
SEMA4B	WDFY3-AS2	0.42245	1.27637e-17	postive
SEMA4C	WDFY3-AS2	0.426803	5.46135e-18	postive
SEMA6D	WDFY3-AS2	0.468887	7.68997e-22	postive
SLIT2	WDFY3-AS2	0.416098	4.30907e-17	postive
CX3CR1	WDFY3-AS2	0.471968	3.82299e-22	postive
CYSLTR1	WDFY3-AS2	0.4049	3.46019e-16	postive
CYSLTR2	WDFY3-AS2	0.412798	8.02656e-17	postive
EDNRA	WDFY3-AS2	0.460259	5.24287e-21	postive
PLXNA1	WDFY3-AS2	0.438967	4.76968e-19	postive
PLXNB2	WDFY3-AS2	0.403412	4.53714e-16	postive
PTAFR	WDFY3-AS2	0.40115	6.83164e-16	postive
ADM	WDFY3-AS2	0.448576	6.47802e-20	postive
BMP1	WDFY3-AS2	0.414976	5.32855e-17	postive
BMP6	WDFY3-AS2	0.421754	1.46022e-17	postive
CMTM1	WDFY3-AS2	0.511585	2.47403e-26	postive
CMTM4	WDFY3-AS2	0.43837	5.38815e-19	postive
CSF1	WDFY3-AS2	0.462419	3.25936e-21	postive
GMFB	WDFY3-AS2	0.423051	1.13601e-17	postive
HBEGF	WDFY3-AS2	0.499722	5.07655e-25	postive
IL6ST	WDFY3-AS2	0.483004	2.94947e-23	postive
JAG1	WDFY3-AS2	0.521315	1.89799e-27	postive
KITLG	WDFY3-AS2	0.425507	7.04121e-18	postive
NOV	WDFY3-AS2	0.496823	1.04354e-24	postive
PDGFC	WDFY3-AS2	0.572252	6.46496e-34	postive
PDGFD	WDFY3-AS2	0.576656	1.57482e-34	postive
TGFA	WDFY3-AS2	0.411693	9.87022e-17	postive
TGFB2	WDFY3-AS2	0.469037	7.43299e-22	postive
TGFB3	WDFY3-AS2	0.47454	2.12178e-22	postive
TNFSF13	WDFY3-AS2	0.501987	2.87738e-25	postive
ACVR2A	WDFY3-AS2	0.502018	2.85488e-25	postive
ANGPTL2	WDFY3-AS2	0.420616	1.81842e-17	postive
BMPR1A	WDFY3-AS2	0.449589	5.2289e-20	postive
BMPR2	WDFY3-AS2	0.631445	5.27402e-43	postive
BRD8	WDFY3-AS2	0.407895	1.99709e-16	postive
CRIM1	WDFY3-AS2	0.597571	1.4246e-37	postive
CRLF3	WDFY3-AS2	0.466894	1.20391e-21	postive
CSF1R	WDFY3-AS2	0.415893	4.47973e-17	postive
FGFR1	WDFY3-AS2	0.494489	1.85439e-24	postive
FLT1	WDFY3-AS2	0.477727	1.01586e-22	postive
IFNGR2	WDFY3-AS2	0.417992	3.00616e-17	postive
IGF1R	WDFY3-AS2	0.465784	1.54346e-21	postive
IL17RA	WDFY3-AS2	0.427523	4.74038e-18	postive
IL17RD	WDFY3-AS2	0.427566	4.70011e-18	postive
IL1R1	WDFY3-AS2	0.543606	3.83128e-30	postive
LIFR	WDFY3-AS2	0.44265	2.23581e-19	postive
NPR3	WDFY3-AS2	0.41996	2.06258e-17	postive
NR2C2	WDFY3-AS2	0.435876	8.94534e-19	postive
NR2F2	WDFY3-AS2	0.569703	1.44964e-33	postive
NR3C1	WDFY3-AS2	0.423491	1.04293e-17	postive
NRP1	WDFY3-AS2	0.631724	4.72722e-43	postive
NRP2	WDFY3-AS2	0.461636	3.87388e-21	postive
OSMR	WDFY3-AS2	0.488525	7.90436e-24	postive
RARB	WDFY3-AS2	0.476137	1.46837e-22	postive
RARG	WDFY3-AS2	0.532353	9.30795e-29	postive
SCTR	WDFY3-AS2	0.440931	3.18797e-19	postive
TGFBR1	WDFY3-AS2	0.494459	1.86842e-24	postive
TGFBR2	WDFY3-AS2	0.495076	1.60564e-24	postive
THRA	WDFY3-AS2	0.586261	6.71366e-36	postive
TNFRSF10C	WDFY3-AS2	0.430995	2.38383e-18	postive
TNFRSF21	WDFY3-AS2	0.434426	1.19882e-18	postive
TUBB3	WDFY3-AS2	0.411701	9.85503e-17	postive
PTPN11	WDFY3-AS2	0.423149	1.1147e-17	postive
GRB2	WDFY3-AS2	0.450499	4.31139e-20	postive
SOS1	WDFY3-AS2	0.483285	2.75985e-23	postive
SOS2	WDFY3-AS2	0.518005	4.58817e-27	postive
BRAF	WDFY3-AS2	0.410797	1.1665e-16	postive
PRKCA	WDFY3-AS2	0.41721	3.48878e-17	postive
NCK1	WDFY3-AS2	0.548625	8.88059e-31	postive
NCK2	WDFY3-AS2	0.41151	1.02123e-16	postive
PAK2	WDFY3-AS2	0.459216	6.58831e-21	postive
RHOA	WDFY3-AS2	0.442383	2.36262e-19	postive
CDC42	WDFY3-AS2	0.430116	2.83898e-18	postive
CBL	WDFY3-AS2	0.539898	1.11078e-29	postive
CBLB	WDFY3-AS2	0.482512	3.31293e-23	postive
PLXNA1	COL18A1-AS1	0.404744	3.55988e-16	postive
PLXNB3	COL18A1-AS1	0.411531	1.01735e-16	postive
BMPR1A	COL18A1-AS1	0.401678	6.21035e-16	postive
FGFR3	COL18A1-AS1	0.410938	1.13624e-16	postive
NFYC	AC132872.1	0.413521	7.00863e-17	postive
PSMC5	AC132872.1	0.505534	1.17268e-25	postive
PSMD3	AC132872.1	0.407089	2.31668e-16	postive
PSMD11	AC132872.1	0.415497	4.82811e-17	postive
RFXAP	AC132872.1	0.422681	1.22036e-17	postive
RFXANK	AC132872.1	0.4354	9.84892e-19	postive
UBXN1	AC132872.1	0.472015	3.78243e-22	postive
LMBR1L	AC132872.1	0.558076	5.28818e-32	postive
IRF3	AC132872.1	0.420911	1.71782e-17	postive
MAPK3	AC132872.1	0.425903	6.5156e-18	postive
SKIV2L	AC132872.1	0.426631	5.64871e-18	postive
PPP4C	AC132872.1	0.419864	2.10125e-17	postive
BIRC5	AC132872.1	0.471313	4.43789e-22	postive
AGER	AC132872.1	0.543434	4.0267e-30	postive
HRAS	AC132872.1	0.441689	2.72686e-19	postive
CORT	AC132872.1	0.413279	7.33439e-17	postive
GNRH1	AC132872.1	0.423633	1.01471e-17	postive
PSPN	AC132872.1	0.403066	4.83121e-16	postive
RABEP2	AC132872.1	0.402141	5.71227e-16	postive
BRD8	AC132872.1	0.470573	5.24996e-22	postive
EPOR	AC132872.1	0.455186	1.58071e-20	postive
MC1R	AC132872.1	0.442402	2.35325e-19	postive
NR2C1	AC132872.1	0.428981	3.55526e-18	postive
LAT	AC132872.1	0.406445	2.60755e-16	postive
GRB2	AC132872.1	0.50474	1.43498e-25	postive
PAK4	AC132872.1	0.408726	1.7132e-16	postive
BMP4	C17orf82	0.446662	9.69036e-20	postive
PRKCA	C17orf82	0.436755	7.4856e-19	postive
MAP3K8	C17orf82	0.410778	1.1706e-16	postive
PDIA2	LINC00221	0.450859	3.99338e-20	postive
XCL1	TCL6	0.415307	5.00501e-17	postive
RFXAP	C9orf163	0.406408	2.6253e-16	postive
KIAA0368	C9orf163	0.404265	3.88487e-16	postive
TRPC4AP	C9orf163	0.449012	5.90881e-20	postive
LMBR1L	C9orf163	0.440155	3.73897e-19	postive
VEGFA	C9orf163	0.403529	4.44124e-16	postive
TYK2	C9orf163	0.448947	5.9903e-20	postive
ELAVL1	C9orf163	0.423159	1.11253e-17	postive
EED	C9orf163	0.426649	5.62921e-18	postive
DDX17	C9orf163	0.440435	3.53024e-19	postive
AGER	C9orf163	0.458931	7.01194e-21	postive
VAV2	C9orf163	0.509264	4.51071e-26	postive
AKT2	C9orf163	0.42762	4.65049e-18	postive
PLXNB1	C9orf163	0.41866	2.646e-17	postive
CMTM4	C9orf163	0.409902	1.37764e-16	postive
GNRH1	C9orf163	0.405237	3.25339e-16	postive
BRD8	C9orf163	0.430563	2.59776e-18	postive
EPOR	C9orf163	0.423829	9.76765e-18	postive
NR2C1	C9orf163	0.45998	5.57365e-21	postive
NR2C2	C9orf163	0.40188	5.98788e-16	postive
PAK4	C9orf163	0.454308	1.90991e-20	postive
CD1A	LINC00173	0.42452	8.53767e-18	postive
CD8B	LINC00173	0.400861	7.19686e-16	postive
FCER1G	LINC00173	0.443085	2.04315e-19	postive
HLA-DMB	LINC00173	0.409649	1.44393e-16	postive
HLA-DOB	LINC00173	0.408138	1.90949e-16	postive
HLA-DPB1	LINC00173	0.419836	2.11256e-17	postive
LTA	LINC00173	0.460825	4.63062e-21	postive
CIITA	LINC00173	0.464017	2.28739e-21	postive
IFI30	LINC00173	0.504768	1.42478e-25	postive
XCL1	LINC00173	0.417219	3.48276e-17	postive
MMP12	LINC00173	0.418036	2.98089e-17	postive
S100B	LINC00173	0.41365	6.84065e-17	postive
LMBR1L	LINC00173	0.401997	5.8631e-16	postive
MMP9	LINC00173	0.41911	2.42777e-17	postive
APOBEC3G	LINC00173	0.520625	2.28335e-27	postive
PLTP	LINC00173	0.419841	2.11037e-17	postive
FABP5	LINC00173	0.419261	2.35862e-17	postive
FABP3	LINC00173	0.435635	9.39244e-19	postive
TNF	LINC00173	0.446414	1.02086e-19	postive
IKBKE	LINC00173	0.431878	1.99881e-18	postive
CCL5	LINC00173	0.412416	8.62233e-17	postive
IL18	LINC00173	0.422683	1.22e-17	postive
SYTL1	LINC00173	0.476255	1.4287e-22	postive
APOBEC3C	LINC00173	0.486098	1.41429e-23	postive
PDCD1	LINC00173	0.472852	3.12414e-22	postive
FASLG	LINC00173	0.413928	6.49196e-17	postive
CCR5	LINC00173	0.445221	1.31022e-19	postive
CD86	LINC00173	0.422867	1.17735e-17	postive
HCK	LINC00173	0.437457	6.4902e-19	postive
RNASE2	LINC00173	0.403718	4.29128e-16	postive
SYK	LINC00173	0.446617	9.78362e-20	postive
BTK	LINC00173	0.455179	1.583e-20	postive
VAV1	LINC00173	0.472921	3.07553e-22	postive
RAC2	LINC00173	0.493716	2.24167e-24	postive
CARD11	LINC00173	0.459839	5.74885e-21	postive
CD19	LINC00173	0.42092	1.71501e-17	postive
PIK3R5	LINC00173	0.417596	3.24158e-17	postive
PIK3CD	LINC00173	0.548091	1.03881e-30	postive
CD72	LINC00173	0.458218	8.19228e-21	postive
LILRB3	LINC00173	0.450139	4.65344e-20	postive
PRKCB	LINC00173	0.437388	6.58184e-19	postive
SEMA4A	LINC00173	0.491344	3.9977e-24	postive
SEMA4D	LINC00173	0.48991	5.65849e-24	postive
CXCR3	LINC00173	0.464683	1.97282e-21	postive
PLXNA1	LINC00173	0.420557	1.83917e-17	postive
PTAFR	LINC00173	0.428571	3.8555e-18	postive
CD70	LINC00173	0.505365	1.22395e-25	postive
CMTM3	LINC00173	0.449768	5.03462e-20	postive
CMTM7	LINC00173	0.490767	4.59805e-24	postive
CSF1	LINC00173	0.439005	4.7328e-19	postive
EBI3	LINC00173	0.41402	6.38026e-17	postive
IL12A	LINC00173	0.445891	1.13896e-19	postive
LTB	LINC00173	0.408157	1.90291e-16	postive
CSF3R	LINC00173	0.481211	4.50077e-23	postive
GIPR	LINC00173	0.479041	7.48137e-23	postive
IL10RA	LINC00173	0.413988	6.41866e-17	postive
IL12RB1	LINC00173	0.455902	1.35438e-20	postive
IL18RAP	LINC00173	0.419869	2.09925e-17	postive
IL21R	LINC00173	0.435022	1.06312e-18	postive
IL2RA	LINC00173	0.416908	3.69532e-17	postive
IL2RB	LINC00173	0.453214	2.41561e-20	postive
IL2RG	LINC00173	0.469157	7.23521e-22	postive
SDC3	LINC00173	0.447601	7.95583e-20	postive
TNFRSF13B	LINC00173	0.408592	1.75603e-16	postive
TNFRSF13C	LINC00173	0.400229	8.06362e-16	postive
TNFRSF18	LINC00173	0.514678	1.10379e-26	postive
TNFRSF8	LINC00173	0.440787	3.28373e-19	postive
TNFRSF9	LINC00173	0.425193	7.4862e-18	postive
ITGB2	LINC00173	0.421645	1.49122e-17	postive
TYROBP	LINC00173	0.422427	1.282e-17	postive
LCK	LINC00173	0.45937	6.37023e-21	postive
CD247	LINC00173	0.460539	4.93103e-21	postive
ZAP70	LINC00173	0.506657	8.80482e-26	postive
LCP2	LINC00173	0.420393	1.89793e-17	postive
LAT	LINC00173	0.432659	1.70979e-18	postive
HCST	LINC00173	0.462631	3.10994e-21	postive
CD48	LINC00173	0.414993	5.31121e-17	postive
CD3D	LINC00173	0.478576	8.33782e-23	postive
CD3E	LINC00173	0.440744	3.31322e-19	postive
CD3G	LINC00173	0.424932	7.87831e-18	postive
ICOS	LINC00173	0.45678	1.11976e-20	postive
CTLA4	LINC00173	0.495827	1.3343e-24	postive
RASGRP1	LINC00173	0.446733	9.54741e-20	postive
PRKCQ	LINC00173	0.413659	6.82901e-17	postive
S100A6	LINC00336	0.4037	4.30569e-16	postive
S100A11	LINC00336	0.426282	6.04958e-18	postive
CRABP2	LINC00336	0.412218	8.9472e-17	postive
GIPR	LINC00336	0.457848	8.87934e-21	postive
CD1A	SNHG12	0.44487	1.40971e-19	postive
FCER1G	SNHG12	0.445944	1.12651e-19	postive
HSPA6	SNHG12	0.451841	3.23961e-20	postive
NFYC	SNHG12	0.410362	1.26479e-16	postive
PSMD13	SNHG12	0.461061	4.39615e-21	postive
RELB	SNHG12	0.437323	6.67033e-19	postive
RFXAP	SNHG12	0.431883	1.99663e-18	postive
RFXANK	SNHG12	0.494249	1.96708e-24	postive
IFI30	SNHG12	0.575169	2.54293e-34	postive
UBXN1	SNHG12	0.424996	7.78088e-18	postive
CXCL3	SNHG12	0.422341	1.30352e-17	postive
TMSB10	SNHG12	0.583691	1.57762e-35	postive
MMP12	SNHG12	0.42655	5.73919e-18	postive
TMSB4X	SNHG12	0.494384	1.90303e-24	postive
S100B	SNHG12	0.478337	8.81481e-23	postive
S100A6	SNHG12	0.538674	1.57378e-29	postive
S100A2	SNHG12	0.437373	6.60212e-19	postive
S100A11	SNHG12	0.543644	3.78921e-30	postive
S100A5	SNHG12	0.423648	1.0116e-17	postive
S100A3	SNHG12	0.458536	7.64312e-21	postive
LMBR1L	SNHG12	0.604908	1.07705e-38	postive
MMP9	SNHG12	0.486402	1.31529e-23	postive
IRF3	SNHG12	0.528355	2.8098e-28	postive
FABP5	SNHG12	0.531434	1.20139e-28	postive
CRABP2	SNHG12	0.428794	3.6889e-18	postive
TNF	SNHG12	0.432048	1.93197e-18	postive
PML	SNHG12	0.409143	1.58581e-16	postive
PPIA	SNHG12	0.466044	1.45628e-21	postive
IKBKE	SNHG12	0.493308	2.47681e-24	postive
CACYBP	SNHG12	0.431336	2.2272e-18	postive
NOD1	SNHG12	0.411837	9.6077e-17	postive
MAPK3	SNHG12	0.424298	8.91448e-18	postive
GRN	SNHG12	0.400218	8.07868e-16	postive
TPM2	SNHG12	0.523938	9.36218e-28	postive
SRC	SNHG12	0.451604	3.40823e-20	postive
SLC11A1	SNHG12	0.417979	3.01328e-17	postive
DMBT1	SNHG12	0.440591	3.41928e-19	postive
EED	SNHG12	0.47774	1.01285e-22	postive
IL18	SNHG12	0.494714	1.75502e-24	postive
IL1A	SNHG12	0.42499	7.78897e-18	postive
SYTL1	SNHG12	0.53159	1.15057e-28	postive
DDX17	SNHG12	0.402979	4.90769e-16	postive
MAP2K2	SNHG12	0.423644	1.01252e-17	postive
HDAC1	SNHG12	0.551198	4.15664e-31	postive
PDCD1	SNHG12	0.427104	5.1483e-18	postive
BIRC5	SNHG12	0.496574	1.10962e-24	postive
AGER	SNHG12	0.638438	3.27719e-44	postive
UNC93B1	SNHG12	0.428566	3.85945e-18	postive
ACTG1	SNHG12	0.444566	1.50201e-19	postive
CXCR4	SNHG12	0.416815	3.76081e-17	postive
FGR	SNHG12	0.401719	6.16529e-16	postive
CD86	SNHG12	0.401051	6.95465e-16	postive
SYK	SNHG12	0.442287	2.4101e-19	postive
RAC1	SNHG12	0.497958	7.87646e-25	postive
RAC2	SNHG12	0.440997	3.14508e-19	postive
NFATC4	SNHG12	0.423614	1.01831e-17	postive
HRAS	SNHG12	0.504309	1.6007e-25	postive
CARD11	SNHG12	0.43403	1.29835e-18	postive
NFKBIE	SNHG12	0.512878	1.76749e-26	postive
PIK3R2	SNHG12	0.447826	7.58839e-20	postive
PIK3CD	SNHG12	0.436712	7.55178e-19	postive
PTPN6	SNHG12	0.461765	3.76496e-21	postive
CKLF	SNHG12	0.489228	6.67208e-24	postive
SEMA4A	SNHG12	0.537073	2.47764e-29	postive
SEMA4D	SNHG12	0.508617	5.32786e-26	postive
SLIT1	SNHG12	0.420642	1.80927e-17	postive
PLAUR	SNHG12	0.538603	1.60591e-29	postive
PLXNA1	SNHG12	0.519266	3.28117e-27	postive
PLXNA3	SNHG12	0.576578	1.61517e-34	postive
PTAFR	SNHG12	0.436048	8.64039e-19	postive
ARTN	SNHG12	0.501824	2.99774e-25	postive
CD320	SNHG12	0.455012	1.64113e-20	postive
CD70	SNHG12	0.401593	6.30674e-16	postive
CMTM3	SNHG12	0.509729	4.00041e-26	postive
CMTM7	SNHG12	0.590207	1.78101e-36	postive
CSF1	SNHG12	0.414411	5.92741e-17	postive
GDF11	SNHG12	0.414267	6.09048e-17	postive
GHRL	SNHG12	0.523641	1.01454e-27	postive
GNRH1	SNHG12	0.595	3.46682e-37	postive
IL11	SNHG12	0.461539	3.95745e-21	postive
IL12A	SNHG12	0.46968	6.42754e-22	postive
INSL3	SNHG12	0.490438	4.98001e-24	postive
LHB	SNHG12	0.420663	1.80211e-17	postive
LIF	SNHG12	0.425205	7.46907e-18	postive
LTB	SNHG12	0.452756	2.66445e-20	postive
MDK	SNHG12	0.417239	3.46999e-17	postive
NMB	SNHG12	0.542402	5.42129e-30	postive
NRG3	SNHG12	0.444136	1.64267e-19	postive
OSM	SNHG12	0.40224	5.61097e-16	postive
PGF	SNHG12	0.412998	7.73157e-17	postive
PTHLH	SNHG12	0.436074	8.59481e-19	postive
QRFP	SNHG12	0.429898	2.96461e-18	postive
RABEP2	SNHG12	0.45587	1.36381e-20	postive
TNFSF9	SNHG12	0.432616	1.72432e-18	postive
UCN2	SNHG12	0.416672	3.8642e-17	postive
CRLF3	SNHG12	0.402005	5.85448e-16	postive
CSF3R	SNHG12	0.435142	1.03766e-18	postive
EPOR	SNHG12	0.427203	5.04828e-18	postive
GIPR	SNHG12	0.624382	8.12876e-42	postive
HTR3A	SNHG12	0.402683	5.17822e-16	postive
IFNGR2	SNHG12	0.510357	3.40186e-26	postive
IL15RA	SNHG12	0.401458	6.46194e-16	postive
IL20RA	SNHG12	0.402415	5.43612e-16	postive
IL21R	SNHG12	0.402771	5.0962e-16	postive
IL2RA	SNHG12	0.42031	1.92871e-17	postive
NR2C1	SNHG12	0.507481	7.13123e-26	postive
OPRD1	SNHG12	0.444566	1.50195e-19	postive
OXTR	SNHG12	0.426027	6.35969e-18	postive
SDC3	SNHG12	0.460944	4.51063e-21	postive
TNFRSF13C	SNHG12	0.418167	2.90743e-17	postive
TNFRSF14	SNHG12	0.433039	1.58425e-18	postive
TNFRSF18	SNHG12	0.525043	6.94046e-28	postive
TNFRSF21	SNHG12	0.424595	8.41338e-18	postive
TUBB3	SNHG12	0.476254	1.42917e-22	postive
TYROBP	SNHG12	0.42313	1.11862e-17	postive
LAT	SNHG12	0.541597	6.83204e-30	postive
PAK4	SNHG12	0.455555	1.4596e-20	postive
CDC42	SNHG12	0.412889	7.89113e-17	postive
CTLA4	SNHG12	0.45102	3.85904e-20	postive
CDK4	SNHG12	0.444971	1.38045e-19	postive
BIRC5	FLVCR1-AS1	0.439216	4.53255e-19	postive
CKLF	FLVCR1-AS1	0.430485	2.63808e-18	postive
GRB2	FLVCR1-AS1	0.416723	3.82762e-17	postive
CDK4	FLVCR1-AS1	0.421524	1.52654e-17	postive
RFXAP	AC012615.1	0.495858	1.32431e-24	postive
TRPC4AP	AC012615.1	0.422606	1.23825e-17	postive
LMBR1L	AC012615.1	0.545566	2.17092e-30	postive
IRF3	AC012615.1	0.413647	6.84385e-17	postive
TYK2	AC012615.1	0.512769	1.81845e-26	postive
ELAVL1	AC012615.1	0.461759	3.77006e-21	postive
EED	AC012615.1	0.427288	4.9646e-18	postive
DDX17	AC012615.1	0.410525	1.22717e-16	postive
MAP2K2	AC012615.1	0.405423	3.1448e-16	postive
HMGB1	AC012615.1	0.401599	6.30042e-16	postive
HDAC1	AC012615.1	0.419037	2.46212e-17	postive
AGER	AC012615.1	0.576499	1.65675e-34	postive
PLXNB1	AC012615.1	0.437373	6.60238e-19	postive
AMH	AC012615.1	0.421535	1.52317e-17	postive
GNRH1	AC012615.1	0.472996	3.02296e-22	postive
PSPN	AC012615.1	0.41599	4.39788e-17	postive
BRD8	AC012615.1	0.426326	5.99699e-18	postive
EPOR	AC012615.1	0.538099	1.85288e-29	postive
IL11RA	AC012615.1	0.46226	3.3755e-21	postive
MC1R	AC012615.1	0.453336	2.3531e-20	postive
NR2C1	AC012615.1	0.492561	2.97274e-24	postive
LAT	AC012615.1	0.420917	1.7161e-17	postive
GRB2	AC012615.1	0.405384	3.16695e-16	postive
PAK4	AC012615.1	0.461002	4.4539e-21	postive
SFTPA2	AC061975.7	0.412205	8.97012e-17	postive
AKT3	AC061975.7	0.414352	5.99362e-17	postive
PLXNB3	AC061975.7	0.418869	2.54215e-17	postive
TGFA	AC061975.7	0.400055	8.31842e-16	postive
SCTR	AC061975.7	0.457804	8.96409e-21	postive
LMBR1L	AL512652.1	0.439758	4.05692e-19	postive
AGER	AL512652.1	0.433425	1.46637e-18	postive
NR2C1	AL512652.1	0.401414	6.51322e-16	postive
LAT	AL512652.1	0.400983	7.03982e-16	postive
FABP6	LINC00501	0.411534	1.01668e-16	postive
NDRG1	LINC00501	0.418315	2.82637e-17	postive
BIRC5	LINC00501	0.43561	9.44075e-19	postive
CKLF	LINC00501	0.421364	1.57434e-17	postive
EPO	LINC00501	0.429801	3.02226e-18	postive
CALCR	LINC00501	0.467405	1.0735e-21	postive
IFNGR1	LINC00272	0.43678	7.44849e-19	postive
RNASEL	LINC00272	0.404194	3.93498e-16	postive
GNAI1	LINC00272	0.46693	1.19423e-21	postive
FGF2	LINC00272	0.464572	2.02198e-21	postive
AQP9	LINC00272	0.451465	3.51046e-20	postive
BMP4	LINC00272	0.522269	1.46892e-27	postive
GIP	LINC00272	0.422749	1.20441e-17	postive
NUDT6	LINC00272	0.491649	3.71159e-24	postive
ADRB2	LINC00272	0.459381	6.35459e-21	postive
GALR3	LINC00272	0.439323	4.43501e-19	postive
IL12RB2	LINC00272	0.405914	2.87455e-16	postive
LGR5	LINC00272	0.545236	2.38947e-30	postive
RXRG	LINC00272	0.443766	1.77387e-19	postive
SSTR1	LINC00272	0.410195	1.30463e-16	postive
TNFRSF19	LINC00272	0.550586	4.98243e-31	postive
TEC	LINC00272	0.554321	1.63979e-31	postive
MAP3K8	LINC00272	0.473482	2.70479e-22	postive
NFYC	AC010536.1	0.431188	2.29356e-18	postive
PSMD7	AC010536.1	0.413766	6.69296e-17	postive
RFXAP	AC010536.1	0.417787	3.12596e-17	postive
ADRM1	AC010536.1	0.418199	2.8896e-17	postive
IRF3	AC010536.1	0.408765	1.70067e-16	postive
SKIV2L	AC010536.1	0.419656	2.18647e-17	postive
PPP4C	AC010536.1	0.417708	3.1734e-17	postive
HDAC1	AC010536.1	0.460731	4.72703e-21	postive
AGER	AC010536.1	0.402598	5.25831e-16	postive
ARTN	AC010536.1	0.412813	8.00402e-17	postive
NR2C1	AC010536.1	0.483016	2.94154e-23	postive
PAK4	AC010536.1	0.433766	1.36909e-18	postive
CDK4	AC010536.1	0.42864	3.80306e-18	postive
CREB1	AC016586.1	0.433906	1.33103e-18	postive
TYK2	AC016586.1	0.43676	7.47744e-19	postive
AHNAK	AC016586.1	0.417022	3.61573e-17	postive
SP1	AC016586.1	0.420837	1.7427e-17	postive
DDX17	AC016586.1	0.467752	9.92829e-22	postive
NFAT5	AC016586.1	0.44295	2.10122e-19	postive
SEMA4C	AC016586.1	0.428411	3.97896e-18	postive
BMP8A	AC016586.1	0.411649	9.95191e-17	postive
CMTM4	AC016586.1	0.400333	7.91379e-16	postive
NR2C2	AC016586.1	0.49112	4.22096e-24	postive
PTPN11	AC016586.1	0.411878	9.535e-17	postive
CBL	AC016586.1	0.443626	1.82615e-19	postive
CANX	AL359878.1	0.452821	2.62747e-20	postive
CREB1	AL359878.1	0.591788	1.04095e-36	postive
NFYA	AL359878.1	0.584244	1.31346e-35	postive
NFYC	AL359878.1	0.49569	1.38026e-24	postive
PSMD3	AL359878.1	0.416259	4.17959e-17	postive
PSMD5	AL359878.1	0.461778	3.75426e-21	postive
PSMD10	AL359878.1	0.431472	2.16755e-18	postive
PSMD11	AL359878.1	0.501473	3.27409e-25	postive
RFX5	AL359878.1	0.485406	1.66816e-23	postive
RFXAP	AL359878.1	0.554185	1.70781e-31	postive
AP3B1	AL359878.1	0.484985	1.84398e-23	postive
PSME3	AL359878.1	0.530135	1.72085e-28	postive
KIAA0368	AL359878.1	0.439948	3.90168e-19	postive
TRPC4AP	AL359878.1	0.47752	1.06581e-22	postive
UBR1	AL359878.1	0.485289	1.71536e-23	postive
CCR10	AL359878.1	0.422158	1.35048e-17	postive
LMBR1L	AL359878.1	0.529424	2.09381e-28	postive
MAVS	AL359878.1	0.504274	1.61468e-25	postive
ZC3HAV1L	AL359878.1	0.474939	1.93552e-22	postive
DUOX1	AL359878.1	0.463676	2.46754e-21	postive
MAPK1	AL359878.1	0.527639	3.41922e-28	postive
PML	AL359878.1	0.405079	3.3489e-16	postive
ISG20L2	AL359878.1	0.535274	4.11291e-29	postive
TFRC	AL359878.1	0.431547	2.13518e-18	postive
VEGFA	AL359878.1	0.539251	1.33572e-29	postive
MAPK14	AL359878.1	0.417229	3.47632e-17	postive
ITGAV	AL359878.1	0.43909	4.65122e-19	postive
EIF2AK2	AL359878.1	0.488758	7.47178e-24	postive
CACYBP	AL359878.1	0.426732	5.53845e-18	postive
NOD1	AL359878.1	0.531264	1.25925e-28	postive
MAPK8	AL359878.1	0.486391	1.3186e-23	postive
MAPK3	AL359878.1	0.441956	2.58098e-19	postive
ADAR	AL359878.1	0.433651	1.40125e-18	postive
TYK2	AL359878.1	0.453915	2.07813e-20	postive
TRAF3	AL359878.1	0.455634	1.43506e-20	postive
NEO1	AL359878.1	0.47378	2.52644e-22	postive
AHNAK	AL359878.1	0.415524	4.804e-17	postive
TCF7L2	AL359878.1	0.465147	1.77922e-21	postive
NFKBIZ	AL359878.1	0.448656	6.37026e-20	postive
LMBR1	AL359878.1	0.424767	8.13535e-18	postive
SRC	AL359878.1	0.452972	2.54441e-20	postive
ELAVL1	AL359878.1	0.456338	1.23224e-20	postive
SP1	AL359878.1	0.628377	1.74512e-42	postive
ECD	AL359878.1	0.486808	1.19359e-23	postive
SKIV2L	AL359878.1	0.427849	4.44573e-18	postive
DCK	AL359878.1	0.533428	6.89682e-29	postive
EED	AL359878.1	0.57088	9.99463e-34	postive
LIMS1	AL359878.1	0.503127	2.15853e-25	postive
BECN1	AL359878.1	0.416043	4.35418e-17	postive
IREB2	AL359878.1	0.507248	7.56936e-26	postive
RELA	AL359878.1	0.409502	1.4839e-16	postive
DDX17	AL359878.1	0.59754	1.44007e-37	postive
2021-09-07	AL359878.1	0.52286	1.25267e-27	postive
MAP2K1	AL359878.1	0.484584	2.02846e-23	postive
LANCL1	AL359878.1	0.483629	2.54394e-23	postive
HMGB1	AL359878.1	0.400201	8.10442e-16	postive
HDAC1	AL359878.1	0.489444	6.33322e-24	postive
TANK	AL359878.1	0.46324	2.71785e-21	postive
TBK1	AL359878.1	0.484282	2.17948e-23	postive
BIRC5	AL359878.1	0.463442	2.59873e-21	postive
AGER	AL359878.1	0.44779	7.64609e-20	postive
TNFSF4	AL359878.1	0.442908	2.11956e-19	postive
JAK2	AL359878.1	0.444007	1.68703e-19	postive
PPP3CA	AL359878.1	0.43376	1.37083e-18	postive
PPP3CB	AL359878.1	0.449535	5.28995e-20	postive
NFAT5	AL359878.1	0.512335	2.03581e-26	postive
NFATC2	AL359878.1	0.412846	7.95511e-17	postive
KRAS	AL359878.1	0.494353	1.91735e-24	postive
NRAS	AL359878.1	0.567565	2.83877e-33	postive
BCL10	AL359878.1	0.482264	3.51285e-23	postive
MALT1	AL359878.1	0.459107	6.748e-21	postive
CHUK	AL359878.1	0.408793	1.69205e-16	postive
IKBKB	AL359878.1	0.467056	1.16091e-21	postive
PIK3CA	AL359878.1	0.525344	6.39537e-28	postive
PIK3CB	AL359878.1	0.475429	1.72917e-22	postive
GSK3B	AL359878.1	0.54188	6.29834e-30	postive
SEMA4B	AL359878.1	0.40857	1.76334e-16	postive
SEMA4C	AL359878.1	0.500972	3.71318e-25	postive
SEMA6A	AL359878.1	0.400555	7.60372e-16	postive
SLIT1	AL359878.1	0.419479	2.26201e-17	postive
LTB4R2	AL359878.1	0.431563	2.12839e-18	postive
PLXNA1	AL359878.1	0.536739	2.7225e-29	postive
PLXNA3	AL359878.1	0.403126	4.77839e-16	postive
BMP8A	AL359878.1	0.518903	3.61483e-27	postive
BMP8B	AL359878.1	0.401687	6.20085e-16	postive
CMTM1	AL359878.1	0.552353	2.95001e-31	postive
CMTM4	AL359878.1	0.515203	9.61568e-27	postive
CMTM6	AL359878.1	0.416718	3.83127e-17	postive
FGF11	AL359878.1	0.450381	4.42094e-20	postive
GMFB	AL359878.1	0.46394	2.32724e-21	postive
GNRH1	AL359878.1	0.532699	8.45257e-29	postive
IL12A	AL359878.1	0.404755	3.55284e-16	postive
KITLG	AL359878.1	0.471961	3.82922e-22	postive
NODAL	AL359878.1	0.407446	2.16936e-16	postive
TXLNA	AL359878.1	0.445478	1.24171e-19	postive
ACVR1B	AL359878.1	0.515473	8.95602e-27	postive
ACVR2A	AL359878.1	0.515005	1.01279e-26	postive
ACVR2B	AL359878.1	0.502658	2.42958e-25	postive
BMPR1A	AL359878.1	0.533315	7.11904e-29	postive
BMPR2	AL359878.1	0.45058	4.2382e-20	postive
BRD8	AL359878.1	0.583336	1.7745e-35	postive
CRLF3	AL359878.1	0.635685	9.87089e-44	postive
EPOR	AL359878.1	0.427925	4.37944e-18	postive
GIPR	AL359878.1	0.443562	1.85051e-19	postive
IGF2R	AL359878.1	0.459939	5.62475e-21	postive
IL17RA	AL359878.1	0.446243	1.05802e-19	postive
LGR4	AL359878.1	0.42315	1.1145e-17	postive
NR2C1	AL359878.1	0.590997	1.36241e-36	postive
NR2C2	AL359878.1	0.635418	1.0977e-43	postive
NR2F2	AL359878.1	0.422217	1.33523e-17	postive
PPARD	AL359878.1	0.44416	1.63427e-19	postive
RARA	AL359878.1	0.409371	1.52044e-16	postive
TGFBR1	AL359878.1	0.422007	1.3905e-17	postive
THRA	AL359878.1	0.517805	4.83814e-27	postive
PTPN11	AL359878.1	0.479751	6.33792e-23	postive
LAT	AL359878.1	0.450951	3.91622e-20	postive
PLCG1	AL359878.1	0.501948	2.90558e-25	postive
SHC1	AL359878.1	0.422398	1.28926e-17	postive
GRB2	AL359878.1	0.546443	1.68188e-30	postive
SOS1	AL359878.1	0.477769	1.00588e-22	postive
SOS2	AL359878.1	0.433889	1.3358e-18	postive
BRAF	AL359878.1	0.530703	1.47093e-28	postive
RAF1	AL359878.1	0.485075	1.80502e-23	postive
PRKCA	AL359878.1	0.476494	1.35208e-22	postive
CASP3	AL359878.1	0.461502	3.9901e-21	postive
NCK1	AL359878.1	0.466695	1.2589e-21	postive
NCK2	AL359878.1	0.473111	2.94476e-22	postive
PAK2	AL359878.1	0.541517	6.99085e-30	postive
PAK4	AL359878.1	0.503524	1.95253e-25	postive
RHOA	AL359878.1	0.40604	2.8088e-16	postive
CDC42	AL359878.1	0.417866	3.07941e-17	postive
CBL	AL359878.1	0.564786	6.75172e-33	postive
CBLB	AL359878.1	0.415583	4.75024e-17	postive
CDK4	AL359878.1	0.471857	3.92071e-22	postive
PGLYRP2	FAM99B	0.446667	9.6804e-20	postive
LPA	FAM99B	0.415031	5.27325e-17	postive
INHBC	FAM99B	0.518478	4.04744e-27	postive
INHBE	FAM99B	0.468003	9.38434e-22	postive
AVPR1A	FAM99B	0.505851	1.08147e-25	postive
GHR	FAM99B	0.46624	1.39362e-21	postive
PGLYRP2	FAM99A	0.491569	3.78437e-24	postive
LPA	FAM99A	0.443472	1.88541e-19	postive
ORM1	FAM99A	0.433776	1.36635e-18	postive
TMPRSS6	FAM99A	0.406764	2.45951e-16	postive
INHBC	FAM99A	0.445994	1.11467e-19	postive
AVPR1A	FAM99A	0.438368	5.39081e-19	postive
GHR	FAM99A	0.430859	2.44898e-18	postive
HSPA1L	AC092117.1	0.451357	3.59227e-20	postive
MAVS	AC092117.1	0.468343	8.69362e-22	postive
TYK2	AC092117.1	0.405401	3.15738e-16	postive
ELAVL1	AC092117.1	0.400763	7.32414e-16	postive
SP1	AC092117.1	0.417147	3.53109e-17	postive
SKIV2L	AC092117.1	0.479421	6.84682e-23	postive
LTB4R	AC092117.1	0.418039	2.97949e-17	postive
AGER	AC092117.1	0.449241	5.62908e-20	postive
AMH	AC092117.1	0.444212	1.61673e-19	postive
CORT	AC092117.1	0.408819	1.684e-16	postive
PSPN	AC092117.1	0.429868	2.98244e-18	postive
BRD8	AC092117.1	0.496655	1.08778e-24	postive
MC1R	AC092117.1	0.509992	3.73761e-26	postive
RXRB	AC092117.1	0.484961	1.85437e-23	postive
THRA	AC092117.1	0.484954	1.85773e-23	postive
PLCG1	AC092117.1	0.409099	1.59873e-16	postive
GRB2	AC092117.1	0.406248	2.70354e-16	postive
PRKCA	AC092117.1	0.488591	7.77979e-24	postive
NR2C1	AC005841.1	0.402913	4.96667e-16	postive
NR2C2	AC005841.1	0.406528	2.56841e-16	postive
NFYC	AC006305.1	0.405435	3.13804e-16	postive
PDIA2	AC006305.1	0.475016	1.90183e-22	postive
XCL1	AC006305.1	0.482761	3.12391e-23	postive
FABP6	AC006305.1	0.400192	8.11709e-16	postive
BIRC5	AC006305.1	0.4659	1.50375e-21	postive
NRAS	AC006305.1	0.446942	9.13705e-20	postive
SEMA3E	AC006305.1	0.401192	6.78021e-16	postive
CALCR	AC006305.1	0.503482	1.97361e-25	postive
PDIA2	AP000525.1	0.43335	1.48847e-18	postive
CREB1	HCG27	0.411971	9.37118e-17	postive
HSPA1L	HCG27	0.464548	2.03285e-21	postive
MICA	HCG27	0.450266	4.53042e-20	postive
NFYA	HCG27	0.4444	1.55481e-19	postive
NFYC	HCG27	0.440044	3.82564e-19	postive
RFX5	HCG27	0.419487	2.25846e-17	postive
RFXAP	HCG27	0.48029	5.58684e-23	postive
UBR1	HCG27	0.411683	9.88866e-17	postive
LMBR1L	HCG27	0.483722	2.48854e-23	postive
VEGFA	HCG27	0.504733	1.43731e-25	postive
MAPK14	HCG27	0.412099	9.14814e-17	postive
TYK2	HCG27	0.438186	5.59453e-19	postive
AHNAK	HCG27	0.422053	1.37826e-17	postive
NFKBIZ	HCG27	0.427688	4.58855e-18	postive
SP1	HCG27	0.469424	6.8105e-22	postive
SKIV2L	HCG27	0.457196	1.02308e-20	postive
DCK	HCG27	0.413833	6.60824e-17	postive
DAXX	HCG27	0.444188	1.62483e-19	postive
LTB4R	HCG27	0.51621	7.37546e-27	postive
TRIM27	HCG27	0.409689	1.43318e-16	postive
DDX17	HCG27	0.473219	2.87255e-22	postive
IRF9	HCG27	0.443074	2.0479e-19	postive
AGER	HCG27	0.529895	1.83907e-28	postive
PPP3R1	HCG27	0.416922	3.68526e-17	postive
PIK3CA	HCG27	0.404155	3.96355e-16	postive
GSK3B	HCG27	0.411796	9.6826e-17	postive
LTB4R2	HCG27	0.459628	6.0209e-21	postive
BRD8	HCG27	0.535199	4.20017e-29	postive
CRLF3	HCG27	0.445942	1.12688e-19	postive
EPOR	HCG27	0.431366	2.21373e-18	postive
IL17RC	HCG27	0.433041	1.5838e-18	postive
NR2C1	HCG27	0.44909	5.81126e-20	postive
NR2C2	HCG27	0.466776	1.2362e-21	postive
RXRB	HCG27	0.534654	4.89542e-29	postive
THRA	HCG27	0.429755	3.05005e-18	postive
LAT	HCG27	0.498535	6.8232e-25	postive
GRB2	HCG27	0.428916	3.6011e-18	postive
RAF1	HCG27	0.441447	2.86626e-19	postive
PRKCA	HCG27	0.40666	2.50695e-16	postive
CANX	C1orf220	0.422225	1.33307e-17	postive
CREB1	C1orf220	0.570293	1.20318e-33	postive
HSPA1L	C1orf220	0.420892	1.72442e-17	postive
NFYA	C1orf220	0.576235	1.80417e-34	postive
NFYC	C1orf220	0.432283	1.84333e-18	postive
PSMD5	C1orf220	0.433605	1.41408e-18	postive
RFX5	C1orf220	0.458647	7.45976e-21	postive
RFXAP	C1orf220	0.563447	1.02197e-32	postive
AP3B1	C1orf220	0.477766	1.00679e-22	postive
PSME3	C1orf220	0.435035	1.06026e-18	postive
TRPC4AP	C1orf220	0.505531	1.17352e-25	postive
UBR1	C1orf220	0.517278	5.56334e-27	postive
LMBR1L	C1orf220	0.486509	1.28198e-23	postive
MAVS	C1orf220	0.484365	2.13683e-23	postive
MAPK1	C1orf220	0.577197	1.32178e-34	postive
ISG20L2	C1orf220	0.520925	2.10681e-27	postive
VEGFA	C1orf220	0.532691	8.47143e-29	postive
MAPK14	C1orf220	0.439658	4.1409e-19	postive
EIF2AK2	C1orf220	0.493636	2.28602e-24	postive
NOD1	C1orf220	0.420363	1.90922e-17	postive
MAPK8	C1orf220	0.559653	3.2734e-32	postive
ADAR	C1orf220	0.469711	6.38319e-22	postive
TYK2	C1orf220	0.555225	1.25027e-31	postive
NEO1	C1orf220	0.433416	1.46881e-18	postive
AHNAK	C1orf220	0.488929	7.17135e-24	postive
TCF7L2	C1orf220	0.437146	6.91415e-19	postive
NFKBIZ	C1orf220	0.411157	1.09074e-16	postive
LMBR1	C1orf220	0.429557	3.17203e-18	postive
ELAVL1	C1orf220	0.463838	2.38045e-21	postive
SP1	C1orf220	0.578821	7.80452e-35	postive
ECD	C1orf220	0.472637	3.28149e-22	postive
SKIV2L	C1orf220	0.408035	1.94647e-16	postive
DCK	C1orf220	0.522083	1.54415e-27	postive
EED	C1orf220	0.453651	2.19965e-20	postive
LIMS1	C1orf220	0.407278	2.23774e-16	postive
BECN1	C1orf220	0.470415	5.44152e-22	postive
IREB2	C1orf220	0.579881	5.52371e-35	postive
ILK	C1orf220	0.481317	4.38999e-23	postive
RELA	C1orf220	0.421988	1.39552e-17	postive
DDX17	C1orf220	0.631076	6.09654e-43	postive
2021-09-07	C1orf220	0.475773	1.59719e-22	postive
MAP2K1	C1orf220	0.48677	1.20446e-23	postive
IRF9	C1orf220	0.420952	1.70437e-17	postive
LANCL1	C1orf220	0.527918	3.16734e-28	postive
HMGB1	C1orf220	0.404286	3.86983e-16	postive
TANK	C1orf220	0.490892	4.46082e-24	postive
TBK1	C1orf220	0.488414	8.11778e-24	postive
TNFSF4	C1orf220	0.401494	6.42063e-16	postive
VAV2	C1orf220	0.473771	2.53129e-22	postive
PPP3CB	C1orf220	0.448013	7.2952e-20	postive
NFAT5	C1orf220	0.527713	3.35044e-28	postive
NFATC2	C1orf220	0.402163	5.68953e-16	postive
NFATC3	C1orf220	0.439245	4.50621e-19	postive
KRAS	C1orf220	0.431933	1.97686e-18	postive
NRAS	C1orf220	0.518108	4.46449e-27	postive
MALT1	C1orf220	0.455633	1.43535e-20	postive
CHUK	C1orf220	0.45342	2.31112e-20	postive
PIK3R1	C1orf220	0.439886	3.95185e-19	postive
PIK3CA	C1orf220	0.503928	1.76282e-25	postive
PIK3CB	C1orf220	0.470499	5.33942e-22	postive
AKT2	C1orf220	0.503753	1.84275e-25	postive
GSK3B	C1orf220	0.534453	5.17831e-29	postive
SEMA4C	C1orf220	0.487457	1.02172e-23	postive
SEMA4G	C1orf220	0.444434	1.54385e-19	postive
SEMA6C	C1orf220	0.447773	7.67243e-20	postive
LTB4R2	C1orf220	0.520373	2.4424e-27	postive
PLXNA2	C1orf220	0.41134	1.05432e-16	postive
PLXNB1	C1orf220	0.477373	1.10296e-22	postive
BMP8A	C1orf220	0.429546	3.17867e-18	postive
CMTM1	C1orf220	0.460654	4.80745e-21	postive
CMTM4	C1orf220	0.43192	1.98185e-18	postive
CMTM6	C1orf220	0.47973	6.36847e-23	postive
CNTF	C1orf220	0.453917	2.07739e-20	postive
FIGNL2	C1orf220	0.448116	7.13813e-20	postive
GDF9	C1orf220	0.448815	6.15999e-20	postive
GMFB	C1orf220	0.439927	3.91864e-19	postive
NODAL	C1orf220	0.484398	2.12015e-23	postive
ACVR1B	C1orf220	0.47275	3.1982e-22	postive
ACVR2A	C1orf220	0.496151	1.23206e-24	postive
ACVR2B	C1orf220	0.515168	9.70351e-27	postive
BMPR1A	C1orf220	0.539276	1.32631e-29	postive
BMPR2	C1orf220	0.462539	3.1736e-21	postive
BRD8	C1orf220	0.540547	9.22899e-30	postive
CRLF3	C1orf220	0.559727	3.20107e-32	postive
EPOR	C1orf220	0.410542	1.22325e-16	postive
FGFR3	C1orf220	0.416752	3.80623e-17	postive
HNF4G	C1orf220	0.413807	6.64139e-17	postive
IGF2R	C1orf220	0.473421	2.74264e-22	postive
IL11RA	C1orf220	0.478453	8.57938e-23	postive
IL17RA	C1orf220	0.430802	2.47705e-18	postive
IL17RC	C1orf220	0.42496	7.83464e-18	postive
IL1RAP	C1orf220	0.461211	4.25393e-21	postive
LGR4	C1orf220	0.523152	1.15785e-27	postive
MPL	C1orf220	0.445742	1.17512e-19	postive
NR1D2	C1orf220	0.415532	4.79678e-17	postive
NR2C1	C1orf220	0.574197	3.47394e-34	postive
NR2C2	C1orf220	0.652352	1.04553e-46	postive
NR2F2	C1orf220	0.414029	6.36961e-17	postive
NR6A1	C1orf220	0.424462	8.63363e-18	postive
PPARA	C1orf220	0.441222	3.00283e-19	postive
PRLR	C1orf220	0.449227	5.64549e-20	postive
RARA	C1orf220	0.443266	1.96773e-19	postive
RXRB	C1orf220	0.422004	1.3914e-17	postive
THRA	C1orf220	0.429802	3.02177e-18	postive
PTPN11	C1orf220	0.554392	1.60523e-31	postive
PLCG1	C1orf220	0.495297	1.52069e-24	postive
GRB2	C1orf220	0.483281	2.76284e-23	postive
SOS1	C1orf220	0.494456	1.86979e-24	postive
SOS2	C1orf220	0.48769	9.66106e-24	postive
BRAF	C1orf220	0.546899	1.47241e-30	postive
RAF1	C1orf220	0.595217	3.21696e-37	postive
PRKCA	C1orf220	0.484006	2.32692e-23	postive
CASP3	C1orf220	0.525827	5.60795e-28	postive
NCK1	C1orf220	0.433674	1.39479e-18	postive
PAK2	C1orf220	0.461663	3.85047e-21	postive
PAK4	C1orf220	0.456482	1.19452e-20	postive
CBL	C1orf220	0.489332	6.50676e-24	postive
CDK4	C1orf220	0.447783	7.6577e-20	postive
XCL1	AL163952.1	0.411755	9.75677e-17	postive
MMP12	AL163952.1	0.414605	5.71397e-17	postive
FABP6	AL163952.1	0.462074	3.51743e-21	postive
SEMA3E	AL163952.1	0.410991	1.12514e-16	postive
CALCR	AL163952.1	0.463496	2.56816e-21	postive
CTSE	UCA1	0.422023	1.38625e-17	postive
PI3	UCA1	0.423617	1.01772e-17	postive
CXCL6	UCA1	0.539222	1.3467e-29	postive
CXCL1	UCA1	0.488634	7.70005e-24	postive
CXCL3	UCA1	0.411917	9.46592e-17	postive
S100A6	UCA1	0.433289	1.50695e-18	postive
PGLYRP4	UCA1	0.404905	3.457e-16	postive
S100A11	UCA1	0.486445	1.3019e-23	postive
TINAGL1	UCA1	0.416019	4.37382e-17	postive
WFDC2	UCA1	0.435756	9.16533e-19	postive
CRABP2	UCA1	0.456753	1.12627e-20	postive
F2R	UCA1	0.413903	6.52254e-17	postive
ITGAV	UCA1	0.43069	2.53304e-18	postive
NOD1	UCA1	0.404198	3.93228e-16	postive
NEO1	UCA1	0.462885	2.93979e-21	postive
CLDN4	UCA1	0.475232	1.8095e-22	postive
CCL28	UCA1	0.422295	1.31513e-17	postive
IL18	UCA1	0.405343	3.1909e-16	postive
PTGS2	UCA1	0.414348	5.99819e-17	postive
ABCC4	UCA1	0.413957	6.45667e-17	postive
PLSCR1	UCA1	0.43384	1.34897e-18	postive
CCL2	UCA1	0.429963	2.92646e-18	postive
SYK	UCA1	0.412354	8.72232e-17	postive
VAV3	UCA1	0.403667	4.3315e-16	postive
NFATC1	UCA1	0.42566	6.83382e-18	postive
CARD11	UCA1	0.426698	5.57549e-18	postive
SEMA3C	UCA1	0.529687	1.94734e-28	postive
SEMA3E	UCA1	0.501869	2.96377e-25	postive
SEMA4A	UCA1	0.402223	5.62803e-16	postive
SEMA4D	UCA1	0.410002	1.35231e-16	postive
SEMA6A	UCA1	0.513717	1.41961e-26	postive
SLIT2	UCA1	0.44163	2.76047e-19	postive
EDNRA	UCA1	0.462502	3.20015e-21	postive
PLAUR	UCA1	0.464676	1.97587e-21	postive
PLXNA1	UCA1	0.425013	7.75464e-18	postive
PLXNA3	UCA1	0.410188	1.30636e-16	postive
PLXNB3	UCA1	0.42712	5.13194e-18	postive
PTAFR	UCA1	0.426935	5.32216e-18	postive
CLCF1	UCA1	0.463233	2.72187e-21	postive
CLEC11A	UCA1	0.433342	1.4908e-18	postive
CMTM4	UCA1	0.432079	1.91986e-18	postive
FGF1	UCA1	0.411162	1.0898e-16	postive
GUCA2A	UCA1	0.400132	8.20485e-16	postive
IL11	UCA1	0.426283	6.04877e-18	postive
JAG1	UCA1	0.505679	1.13018e-25	postive
JAG2	UCA1	0.426587	5.69846e-18	postive
LIF	UCA1	0.479791	6.27878e-23	postive
LTBP2	UCA1	0.420773	1.76416e-17	postive
LTBP4	UCA1	0.436715	7.54705e-19	postive
NRG3	UCA1	0.524569	7.89153e-28	postive
PDGFA	UCA1	0.403915	4.14038e-16	postive
PDGFD	UCA1	0.45739	9.80992e-21	postive
PTHLH	UCA1	0.473621	2.62e-22	postive
RABEP2	UCA1	0.400381	7.84579e-16	postive
TGFA	UCA1	0.560823	2.28971e-32	postive
TGFB2	UCA1	0.458663	7.43441e-21	postive
TGFB3	UCA1	0.418261	2.85556e-17	postive
TNFSF15	UCA1	0.496753	1.06175e-24	postive
BMPR1B	UCA1	0.46661	1.28309e-21	postive
CRLF1	UCA1	0.441878	2.62254e-19	postive
FGFR1	UCA1	0.434036	1.29693e-18	postive
FGFR2	UCA1	0.412112	9.12647e-17	postive
GIPR	UCA1	0.468859	7.73827e-22	postive
GLP2R	UCA1	0.491805	3.57326e-24	postive
IGF1R	UCA1	0.490926	4.42426e-24	postive
IL17RD	UCA1	0.420698	1.78982e-17	postive
IL20RA	UCA1	0.441297	2.95644e-19	postive
IL4R	UCA1	0.433781	1.36516e-18	postive
IL9R	UCA1	0.446177	1.07274e-19	postive
OXTR	UCA1	0.515259	9.47463e-27	postive
RARG	UCA1	0.445523	1.23006e-19	postive
SCTR	UCA1	0.612405	7.177e-40	postive
TNFRSF21	UCA1	0.40102	6.99383e-16	postive
TUBB3	UCA1	0.531149	1.30019e-28	postive
NCK2	UCA1	0.470029	5.93963e-22	postive
PAK6	UCA1	0.436759	7.47937e-19	postive
CANX	ST7-OT4	0.401306	6.64153e-16	postive
CREB1	ST7-OT4	0.448021	7.28247e-20	postive
HSP90AB1	ST7-OT4	0.401594	6.30512e-16	postive
NFYA	ST7-OT4	0.479857	6.18206e-23	postive
PSMC2	ST7-OT4	0.433055	1.57913e-18	postive
PSMD11	ST7-OT4	0.416378	4.08642e-17	postive
AP3B1	ST7-OT4	0.4265	5.79573e-18	postive
PSME3	ST7-OT4	0.460482	4.99303e-21	postive
KIAA0368	ST7-OT4	0.42932	3.32429e-18	postive
TRPC4AP	ST7-OT4	0.423204	1.10271e-17	postive
UBR1	ST7-OT4	0.451532	3.461e-20	postive
ZC3HAV1	ST7-OT4	0.428845	3.65192e-18	postive
MAPK1	ST7-OT4	0.500376	4.31066e-25	postive
ISG20L2	ST7-OT4	0.422316	1.3099e-17	postive
MAPK14	ST7-OT4	0.464714	1.95925e-21	postive
EIF2AK2	ST7-OT4	0.412894	7.88399e-17	postive
MAPK8	ST7-OT4	0.47856	8.36808e-23	postive
GNAI1	ST7-OT4	0.486073	1.4229e-23	postive
ADAR	ST7-OT4	0.418651	2.65079e-17	postive
TYK2	ST7-OT4	0.417678	3.19147e-17	postive
TCF7L2	ST7-OT4	0.44377	1.77233e-19	postive
LMBR1	ST7-OT4	0.480481	5.34234e-23	postive
SP1	ST7-OT4	0.457797	8.97889e-21	postive
ECD	ST7-OT4	0.4475	8.12681e-20	postive
SKIV2L	ST7-OT4	0.42197	1.40057e-17	postive
DCK	ST7-OT4	0.417055	3.59314e-17	postive
LIMS1	ST7-OT4	0.419478	2.26245e-17	postive
BECN1	ST7-OT4	0.447315	8.44935e-20	postive
IREB2	ST7-OT4	0.470931	4.84069e-22	postive
ILK	ST7-OT4	0.402485	5.36719e-16	postive
RELA	ST7-OT4	0.451641	3.38091e-20	postive
DDX17	ST7-OT4	0.448337	6.81277e-20	postive
2021-09-07	ST7-OT4	0.43798	5.83513e-19	postive
LANCL1	ST7-OT4	0.426254	6.08226e-18	postive
TBK1	ST7-OT4	0.435604	9.45142e-19	postive
PTK2	ST7-OT4	0.432621	1.72264e-18	postive
PPP3CB	ST7-OT4	0.475098	1.86618e-22	postive
NFAT5	ST7-OT4	0.518909	3.6086e-27	postive
NFATC3	ST7-OT4	0.491771	3.6033e-24	postive
NRAS	ST7-OT4	0.409306	1.53862e-16	postive
MALT1	ST7-OT4	0.461654	3.8584e-21	postive
CHUK	ST7-OT4	0.471456	4.29619e-22	postive
PIK3CA	ST7-OT4	0.452513	2.80654e-20	postive
PIK3CB	ST7-OT4	0.407923	1.98696e-16	postive
GSK3B	ST7-OT4	0.462184	3.43282e-21	postive
SBDS	ST7-OT4	0.427957	4.3519e-18	postive
PLXNA2	ST7-OT4	0.43066	2.54816e-18	postive
CNTF	ST7-OT4	0.404419	3.77758e-16	postive
NODAL	ST7-OT4	0.438431	5.32198e-19	postive
BMPR1A	ST7-OT4	0.460678	4.78216e-21	postive
BRD8	ST7-OT4	0.441766	2.68425e-19	postive
CRLF3	ST7-OT4	0.44447	1.53217e-19	postive
MET	ST7-OT4	0.496098	1.24812e-24	postive
NR1D2	ST7-OT4	0.40222	5.63113e-16	postive
NR2C1	ST7-OT4	0.410278	1.28469e-16	postive
NR2C2	ST7-OT4	0.520122	2.61197e-27	postive
RXRB	ST7-OT4	0.47086	4.91981e-22	postive
PTPN11	ST7-OT4	0.455288	1.5464e-20	postive
PLCG1	ST7-OT4	0.485903	1.48178e-23	postive
GRB2	ST7-OT4	0.417943	3.03446e-17	postive
SOS1	ST7-OT4	0.468891	7.68217e-22	postive
BRAF	ST7-OT4	0.561294	1.98218e-32	postive
RAF1	ST7-OT4	0.40988	1.38333e-16	postive
PRKCA	ST7-OT4	0.47171	4.05452e-22	postive
NCK1	ST7-OT4	0.420584	1.8297e-17	postive
MAP3K8	ST7-OT4	0.40703	2.34209e-16	postive
AZGP1	AC010336.2	0.416322	4.12969e-17	postive
RBP4	AC010336.2	0.435737	9.20094e-19	postive
RBP5	AC010336.2	0.481242	4.46804e-23	postive
IL27	AC010336.2	0.45681	1.11252e-20	postive
KLKB1	AC010336.2	0.431414	2.19286e-18	postive
BPHL	AC010336.2	0.412013	9.29675e-17	postive
AQP9	AC010336.2	0.488351	8.24252e-24	postive
ANXA6	AC010336.2	0.46343	2.60549e-21	postive
CCL16	AC010336.2	0.479145	7.30218e-23	postive
RAC3	AC010336.2	0.405665	3.00861e-16	postive
CAT	AC010336.2	0.484694	1.97626e-23	postive
AR	AC010336.2	0.455425	1.50124e-20	postive
ESR1	AC010336.2	0.505016	1.33777e-25	postive
NR1I2	AC010336.2	0.497698	8.40141e-25	postive
NR1I3	AC010336.2	0.464772	1.93401e-21	postive
RORA	AC010336.2	0.402662	5.1977e-16	postive
IFNGR1	LINC00488	0.441937	2.59107e-19	postive
FGF2	LINC00488	0.448423	6.69104e-20	postive
CCR3	LINC00488	0.616484	1.59421e-40	postive
IKBKG	LINC00488	0.40647	2.59593e-16	postive
BMP1	LINC00488	0.404278	3.87563e-16	postive
BMP4	LINC00488	0.400503	7.67537e-16	postive
GIP	LINC00488	0.496468	1.13914e-24	postive
TNFRSF19	LINC00488	0.412965	7.7792e-17	postive
TEC	LINC00488	0.473342	2.79307e-22	postive
SEMA4A	MEG3	0.41074	1.17889e-16	postive
DUOX1	AC007952.2	0.403687	4.31537e-16	postive
KCNH2	AC007952.2	0.436016	8.6951e-19	postive
NFATC4	AC007952.2	0.445614	1.2068e-19	postive
MAVS	AC011481.1	0.438572	5.17044e-19	postive
EED	AC011481.1	0.436302	8.20643e-19	postive
AGER	AC011481.1	0.444307	1.58504e-19	postive
CMTM4	AC011481.1	0.407323	2.21927e-16	postive
BRD8	AC011481.1	0.449337	5.5155e-20	postive
NR2C1	AC011481.1	0.407001	2.35443e-16	postive
PAK4	AC011481.1	0.469128	7.282e-22	postive
MICA	AC003102.1	0.442631	2.24448e-19	postive
NFYC	AC003102.1	0.41624	4.19444e-17	postive
PSMD3	AC003102.1	0.426933	5.32363e-18	postive
PSMD11	AC003102.1	0.450507	4.30392e-20	postive
RFXAP	AC003102.1	0.49766	8.4806e-25	postive
PSME3	AC003102.1	0.406624	2.52352e-16	postive
LMBR1L	AC003102.1	0.506531	9.09351e-26	postive
DUOX1	AC003102.1	0.41899	2.48397e-17	postive
VEGFA	AC003102.1	0.453195	2.4256e-20	postive
NOD1	AC003102.1	0.423392	1.06327e-17	postive
MAPK3	AC003102.1	0.418191	2.89384e-17	postive
GRN	AC003102.1	0.431391	2.20294e-18	postive
TYK2	AC003102.1	0.49661	1.09994e-24	postive
ELAVL1	AC003102.1	0.450074	4.71804e-20	postive
SP1	AC003102.1	0.440043	3.82661e-19	postive
SKIV2L	AC003102.1	0.402234	5.61656e-16	postive
DAXX	AC003102.1	0.429728	3.06643e-18	postive
EED	AC003102.1	0.428794	3.68902e-18	postive
LTB4R	AC003102.1	0.527181	3.87537e-28	postive
AGER	AC003102.1	0.554457	1.57434e-31	postive
LTB4R2	AC003102.1	0.423705	1.0006e-17	postive
AMH	AC003102.1	0.456708	1.13752e-20	postive
ARTN	AC003102.1	0.43203	1.93875e-18	postive
CORT	AC003102.1	0.416842	3.74165e-17	postive
GNRH1	AC003102.1	0.45289	2.58941e-20	postive
BMPR1A	AC003102.1	0.404772	3.54154e-16	postive
BRD8	AC003102.1	0.48132	4.38745e-23	postive
CRLF3	AC003102.1	0.41583	4.53327e-17	postive
EPOR	AC003102.1	0.503054	2.199e-25	postive
GIPR	AC003102.1	0.415659	4.68229e-17	postive
MC1R	AC003102.1	0.563174	1.11174e-32	postive
NR2C1	AC003102.1	0.457272	1.00647e-20	postive
RARA	AC003102.1	0.405578	3.0567e-16	postive
RXRB	AC003102.1	0.441509	2.83011e-19	postive
THRA	AC003102.1	0.519305	3.24789e-27	postive
LAT	AC003102.1	0.43841	5.34471e-19	postive
PLCG1	AC003102.1	0.486334	1.33684e-23	postive
GRB2	AC003102.1	0.446404	1.02291e-19	postive
PRKCA	AC003102.1	0.496993	1.00041e-24	postive
PAK4	AC003102.1	0.444594	1.4931e-19	postive
CANX	MCM3AP-AS1	0.532427	9.11817e-29	postive
CREB1	MCM3AP-AS1	0.718597	1.19206e-60	postive
HSPA1L	MCM3AP-AS1	0.485092	1.79752e-23	postive
HSPA4	MCM3AP-AS1	0.411432	1.03636e-16	postive
HSP90AA1	MCM3AP-AS1	0.416087	4.31797e-17	postive
HSP90AB1	MCM3AP-AS1	0.525651	5.8823e-28	postive
MICB	MCM3AP-AS1	0.401993	5.86748e-16	postive
NFYA	MCM3AP-AS1	0.742668	9.17342e-67	postive
NFYC	MCM3AP-AS1	0.538146	1.82875e-29	postive
PSMC1	MCM3AP-AS1	0.502084	2.80762e-25	postive
PSMC6	MCM3AP-AS1	0.520657	2.26377e-27	postive
PSMD1	MCM3AP-AS1	0.507585	6.94413e-26	postive
PSMD2	MCM3AP-AS1	0.491268	4.0723e-24	postive
PSMD3	MCM3AP-AS1	0.494359	1.91487e-24	postive
PSMD5	MCM3AP-AS1	0.563752	9.29965e-33	postive
PSMD10	MCM3AP-AS1	0.54507	2.50761e-30	postive
PSMD11	MCM3AP-AS1	0.571028	9.53516e-34	postive
RFX5	MCM3AP-AS1	0.523992	9.22617e-28	postive
RFXAP	MCM3AP-AS1	0.665456	3.51045e-49	postive
AP3B1	MCM3AP-AS1	0.623185	1.28294e-41	postive
PSMD6	MCM3AP-AS1	0.493769	2.21273e-24	postive
PSME3	MCM3AP-AS1	0.681589	2.0952e-52	postive
PSMD14	MCM3AP-AS1	0.47986	6.17799e-23	postive
IFI30	MCM3AP-AS1	0.405409	3.15276e-16	postive
KIAA0368	MCM3AP-AS1	0.554432	1.58589e-31	postive
TRPC4AP	MCM3AP-AS1	0.621	2.93788e-41	postive
UBR1	MCM3AP-AS1	0.622849	1.45823e-41	postive
ZC3HAV1	MCM3AP-AS1	0.576281	1.77761e-34	postive
LMBR1L	MCM3AP-AS1	0.608089	3.44332e-39	postive
MAVS	MCM3AP-AS1	0.628778	1.49368e-42	postive
ZC3HAV1L	MCM3AP-AS1	0.525956	5.41372e-28	postive
IFNAR1	MCM3AP-AS1	0.437345	6.64022e-19	postive
NFKB1	MCM3AP-AS1	0.552282	3.01257e-31	postive
NOD2	MCM3AP-AS1	0.427146	5.10561e-18	postive
DDX58	MCM3AP-AS1	0.403142	4.765e-16	postive
DUOX1	MCM3AP-AS1	0.48366	2.52587e-23	postive
MAPK1	MCM3AP-AS1	0.699881	2.53873e-56	postive
PML	MCM3AP-AS1	0.434731	1.12732e-18	postive
ISG20L2	MCM3AP-AS1	0.660983	2.53384e-48	postive
TFRC	MCM3AP-AS1	0.52268	1.31511e-27	postive
TRIM5	MCM3AP-AS1	0.429212	3.39608e-18	postive
NLRX1	MCM3AP-AS1	0.450769	4.07089e-20	postive
VEGFA	MCM3AP-AS1	0.653785	5.68692e-47	postive
TNFAIP3	MCM3AP-AS1	0.484517	2.0608e-23	postive
CYLD	MCM3AP-AS1	0.427022	5.23108e-18	postive
MAPK14	MCM3AP-AS1	0.585846	7.71116e-36	postive
ITGAV	MCM3AP-AS1	0.457014	1.06431e-20	postive
IRF5	MCM3AP-AS1	0.426	6.39297e-18	postive
EIF2AK2	MCM3AP-AS1	0.681841	1.85902e-52	postive
CACYBP	MCM3AP-AS1	0.489485	6.27045e-24	postive
NOD1	MCM3AP-AS1	0.615624	2.19324e-40	postive
MAPK8	MCM3AP-AS1	0.673171	1.06883e-50	postive
MAPK3	MCM3AP-AS1	0.454265	1.92768e-20	postive
ADAR	MCM3AP-AS1	0.565185	5.96433e-33	postive
TYK2	MCM3AP-AS1	0.630572	7.42528e-43	postive
TRAF3	MCM3AP-AS1	0.586011	7.29701e-36	postive
NEO1	MCM3AP-AS1	0.561974	1.60852e-32	postive
AHNAK	MCM3AP-AS1	0.507457	7.17652e-26	postive
TCF7L2	MCM3AP-AS1	0.592459	8.28357e-37	postive
NFKBIZ	MCM3AP-AS1	0.538784	1.52559e-29	postive
LMBR1	MCM3AP-AS1	0.589279	2.43686e-36	postive
SRC	MCM3AP-AS1	0.517776	4.87508e-27	postive
ELAVL1	MCM3AP-AS1	0.604867	1.09323e-38	postive
SP1	MCM3AP-AS1	0.726111	1.72963e-62	postive
ECD	MCM3AP-AS1	0.665947	2.81879e-49	postive
SKIV2L	MCM3AP-AS1	0.59171	1.06895e-36	postive
DCK	MCM3AP-AS1	0.641326	1.01876e-44	postive
DAXX	MCM3AP-AS1	0.512984	1.71896e-26	postive
TNFRSF10A	MCM3AP-AS1	0.434715	1.13113e-18	postive
TNFRSF10B	MCM3AP-AS1	0.537462	2.21949e-29	postive
EED	MCM3AP-AS1	0.668164	1.04312e-49	postive
LIMS1	MCM3AP-AS1	0.62946	1.14563e-42	postive
BECN1	MCM3AP-AS1	0.608089	3.44388e-39	postive
CSK	MCM3AP-AS1	0.491294	4.04618e-24	postive
JAK1	MCM3AP-AS1	0.494547	1.82846e-24	postive
IREB2	MCM3AP-AS1	0.642224	7.06451e-45	postive
ILK	MCM3AP-AS1	0.567543	2.8583e-33	postive
TRIM27	MCM3AP-AS1	0.416995	3.63422e-17	postive
RELA	MCM3AP-AS1	0.577329	1.26671e-34	postive
IFNAR2	MCM3AP-AS1	0.569237	1.67905e-33	postive
DDX17	MCM3AP-AS1	0.737969	1.61727e-65	postive
2021-09-07	MCM3AP-AS1	0.666074	2.66384e-49	postive
MAP2K1	MCM3AP-AS1	0.610801	1.28908e-39	postive
NDRG1	MCM3AP-AS1	0.42794	4.36699e-18	postive
IRF9	MCM3AP-AS1	0.508153	6.0021e-26	postive
LANCL1	MCM3AP-AS1	0.635987	8.75069e-44	postive
HMGB1	MCM3AP-AS1	0.546656	1.58065e-30	postive
HDAC1	MCM3AP-AS1	0.546472	1.66771e-30	postive
PLSCR1	MCM3AP-AS1	0.458656	7.44609e-21	postive
TANK	MCM3AP-AS1	0.609695	1.92695e-39	postive
PIK3CG	MCM3AP-AS1	0.430194	2.79533e-18	postive
TBK1	MCM3AP-AS1	0.632165	3.97516e-43	postive
PDGFRB	MCM3AP-AS1	0.426429	5.87715e-18	postive
BIRC5	MCM3AP-AS1	0.448004	7.30806e-20	postive
AGER	MCM3AP-AS1	0.534555	5.03253e-29	postive
UNC93B1	MCM3AP-AS1	0.410016	1.34889e-16	postive
TNFSF4	MCM3AP-AS1	0.475978	1.52313e-22	postive
ACTG1	MCM3AP-AS1	0.456402	1.21547e-20	postive
LTBP1	MCM3AP-AS1	0.430067	2.86691e-18	postive
JAK2	MCM3AP-AS1	0.521584	1.76583e-27	postive
PTK2	MCM3AP-AS1	0.540486	9.39092e-30	postive
VAV3	MCM3AP-AS1	0.419976	2.05626e-17	postive
VAV2	MCM3AP-AS1	0.486805	1.19438e-23	postive
PPP3CA	MCM3AP-AS1	0.484111	2.26954e-23	postive
PPP3CB	MCM3AP-AS1	0.606892	5.29687e-39	postive
PPP3R1	MCM3AP-AS1	0.536954	2.56205e-29	postive
NFAT5	MCM3AP-AS1	0.633183	2.66193e-43	postive
NFATC2	MCM3AP-AS1	0.463255	2.70853e-21	postive
NFATC3	MCM3AP-AS1	0.510022	3.70932e-26	postive
KRAS	MCM3AP-AS1	0.62909	1.32324e-42	postive
NRAS	MCM3AP-AS1	0.655119	3.21577e-47	postive
BCL10	MCM3AP-AS1	0.597444	1.48881e-37	postive
MALT1	MCM3AP-AS1	0.650431	2.35389e-46	postive
CHUK	MCM3AP-AS1	0.57307	4.98119e-34	postive
IKBKB	MCM3AP-AS1	0.56226	1.47332e-32	postive
PIK3CA	MCM3AP-AS1	0.648083	6.29828e-46	postive
PIK3CB	MCM3AP-AS1	0.568713	1.98047e-33	postive
AKT1	MCM3AP-AS1	0.480218	5.68229e-23	postive
AKT2	MCM3AP-AS1	0.553955	1.82954e-31	postive
GSK3B	MCM3AP-AS1	0.65252	9.73839e-47	postive
PTPN6	MCM3AP-AS1	0.415335	4.97823e-17	postive
SBDS	MCM3AP-AS1	0.422973	1.15322e-17	postive
SEMA3F	MCM3AP-AS1	0.489715	5.9322e-24	postive
SEMA4B	MCM3AP-AS1	0.440392	3.56161e-19	postive
SEMA4C	MCM3AP-AS1	0.674404	6.0581e-51	postive
SEMA5B	MCM3AP-AS1	0.464054	2.26906e-21	postive
SEMA6C	MCM3AP-AS1	0.400235	8.05498e-16	postive
SEMA6D	MCM3AP-AS1	0.402237	5.61372e-16	postive
SLIT1	MCM3AP-AS1	0.419582	2.21796e-17	postive
LTB4R2	MCM3AP-AS1	0.508012	6.22427e-26	postive
PLXNA1	MCM3AP-AS1	0.633528	2.32286e-43	postive
PLXNA2	MCM3AP-AS1	0.472084	3.72329e-22	postive
PLXNA3	MCM3AP-AS1	0.420431	1.88414e-17	postive
PLXNB1	MCM3AP-AS1	0.546623	1.59576e-30	postive
PLXNB2	MCM3AP-AS1	0.413444	7.11015e-17	postive
PLXNB3	MCM3AP-AS1	0.431559	2.13023e-18	postive
PLXNC1	MCM3AP-AS1	0.400124	8.21653e-16	postive
PLXND1	MCM3AP-AS1	0.468045	9.29561e-22	postive
AMH	MCM3AP-AS1	0.403162	4.74774e-16	postive
ARTN	MCM3AP-AS1	0.41649	4.00045e-17	postive
BMP8A	MCM3AP-AS1	0.539798	1.14295e-29	postive
CMTM1	MCM3AP-AS1	0.619957	4.35248e-41	postive
CMTM4	MCM3AP-AS1	0.606982	5.12909e-39	postive
CMTM6	MCM3AP-AS1	0.510576	3.21412e-26	postive
CNTF	MCM3AP-AS1	0.556766	7.86111e-32	postive
FAM3C	MCM3AP-AS1	0.421388	1.56708e-17	postive
FGF11	MCM3AP-AS1	0.457093	1.04634e-20	postive
FIGNL2	MCM3AP-AS1	0.428474	3.92983e-18	postive
GDF11	MCM3AP-AS1	0.44913	5.76259e-20	postive
GDF9	MCM3AP-AS1	0.417079	3.57679e-17	postive
GMFB	MCM3AP-AS1	0.596173	2.31255e-37	postive
GNRH1	MCM3AP-AS1	0.481882	3.84334e-23	postive
HDGF	MCM3AP-AS1	0.464822	1.91262e-21	postive
IL12A	MCM3AP-AS1	0.43819	5.59049e-19	postive
JAG1	MCM3AP-AS1	0.464924	1.86961e-21	postive
KITLG	MCM3AP-AS1	0.531614	1.14291e-28	postive
LTBP3	MCM3AP-AS1	0.409583	1.4618e-16	postive
NODAL	MCM3AP-AS1	0.515961	7.87648e-27	postive
NRG3	MCM3AP-AS1	0.415986	4.40153e-17	postive
PDGFB	MCM3AP-AS1	0.463842	2.3781e-21	postive
QRFP	MCM3AP-AS1	0.44535	1.27524e-19	postive
RABEP1	MCM3AP-AS1	0.445032	1.36288e-19	postive
TNFSF13	MCM3AP-AS1	0.492152	3.28409e-24	postive
TNFSF15	MCM3AP-AS1	0.434474	1.1874e-18	postive
TXLNA	MCM3AP-AS1	0.507546	7.01366e-26	postive
ACVR1B	MCM3AP-AS1	0.55698	7.36907e-32	postive
ACVR2A	MCM3AP-AS1	0.606839	5.39927e-39	postive
ACVR2B	MCM3AP-AS1	0.628003	2.01789e-42	postive
ADIPOR1	MCM3AP-AS1	0.461381	4.09766e-21	postive
BMPR1A	MCM3AP-AS1	0.700334	2.01239e-56	postive
BMPR2	MCM3AP-AS1	0.542974	4.59794e-30	postive
BRD8	MCM3AP-AS1	0.663124	9.87991e-49	postive
CRLF3	MCM3AP-AS1	0.739105	8.12482e-66	postive
EPOR	MCM3AP-AS1	0.479628	6.52327e-23	postive
FGFR3	MCM3AP-AS1	0.447265	8.53892e-20	postive
FLT1	MCM3AP-AS1	0.406808	2.43956e-16	postive
HNF4G	MCM3AP-AS1	0.466566	1.29556e-21	postive
IFNGR2	MCM3AP-AS1	0.548992	7.9725e-31	postive
IGF1R	MCM3AP-AS1	0.438801	4.935e-19	postive
IGF2R	MCM3AP-AS1	0.584058	1.39715e-35	postive
IL10RB	MCM3AP-AS1	0.408703	1.72039e-16	postive
IL17RA	MCM3AP-AS1	0.521995	1.58107e-27	postive
IL1R1	MCM3AP-AS1	0.418504	2.72596e-17	postive
IL1RAP	MCM3AP-AS1	0.461417	4.06519e-21	postive
LGR4	MCM3AP-AS1	0.575196	2.52065e-34	postive
MC1R	MCM3AP-AS1	0.443979	1.69693e-19	postive
MPL	MCM3AP-AS1	0.424017	9.41637e-18	postive
NR1D2	MCM3AP-AS1	0.433784	1.36424e-18	postive
NR2C1	MCM3AP-AS1	0.696348	1.52752e-55	postive
NR2C2	MCM3AP-AS1	0.764186	7.72132e-73	postive
NR2F2	MCM3AP-AS1	0.538761	1.53563e-29	postive
NR3C1	MCM3AP-AS1	0.408601	1.75328e-16	postive
NR6A1	MCM3AP-AS1	0.519682	2.93688e-27	postive
NRP1	MCM3AP-AS1	0.475434	1.72722e-22	postive
OPRL1	MCM3AP-AS1	0.401718	6.1664e-16	postive
PPARD	MCM3AP-AS1	0.567444	2.94856e-33	postive
RARA	MCM3AP-AS1	0.433048	1.58136e-18	postive
RARG	MCM3AP-AS1	0.420921	1.71479e-17	postive
RXRB	MCM3AP-AS1	0.52524	6.57782e-28	postive
SCTR	MCM3AP-AS1	0.441392	2.89896e-19	postive
TGFBR1	MCM3AP-AS1	0.544954	2.59381e-30	postive
TGFBR2	MCM3AP-AS1	0.433115	1.5603e-18	postive
THRA	MCM3AP-AS1	0.592777	7.42946e-37	postive
TNFRSF10D	MCM3AP-AS1	0.422692	1.21794e-17	postive
TNFRSF21	MCM3AP-AS1	0.409947	1.36619e-16	postive
TUBB3	MCM3AP-AS1	0.427547	4.71852e-18	postive
PTPN11	MCM3AP-AS1	0.639582	2.0663e-44	postive
PAK1	MCM3AP-AS1	0.462202	3.41911e-21	postive
LAT	MCM3AP-AS1	0.497174	9.5658e-25	postive
PLCG1	MCM3AP-AS1	0.644236	3.0983e-45	postive
SH3BP2	MCM3AP-AS1	0.420676	1.79743e-17	postive
SHC1	MCM3AP-AS1	0.516259	7.28098e-27	postive
GRB2	MCM3AP-AS1	0.638548	3.13518e-44	postive
SOS1	MCM3AP-AS1	0.632718	3.19802e-43	postive
SOS2	MCM3AP-AS1	0.564446	7.50132e-33	postive
BRAF	MCM3AP-AS1	0.727771	6.66039e-63	postive
RAF1	MCM3AP-AS1	0.60825	3.24957e-39	postive
PRKCA	MCM3AP-AS1	0.577192	1.32409e-34	postive
CASP3	MCM3AP-AS1	0.609219	2.28886e-39	postive
NCK1	MCM3AP-AS1	0.609241	2.27109e-39	postive
NCK2	MCM3AP-AS1	0.492572	2.9647e-24	postive
PAK2	MCM3AP-AS1	0.654705	3.83966e-47	postive
PAK4	MCM3AP-AS1	0.619804	4.60939e-41	postive
RHOA	MCM3AP-AS1	0.526146	5.14053e-28	postive
CDC42	MCM3AP-AS1	0.48767	9.708e-24	postive
MAP3K8	MCM3AP-AS1	0.416369	4.09299e-17	postive
CBL	MCM3AP-AS1	0.686201	2.29565e-53	postive
CBLB	MCM3AP-AS1	0.524183	8.76203e-28	postive
CDK4	MCM3AP-AS1	0.634524	1.56584e-43	postive
PRDX1	LINC00189	0.461841	3.70217e-21	postive
NRAS	LINC00189	0.44941	5.43091e-20	postive
LCN2	AL357060.1	0.539484	1.25015e-29	postive
LYZ	AL357060.1	0.405715	2.98086e-16	postive
RFXAP	AC016773.1	0.459274	6.5058e-21	postive
RFXANK	AC016773.1	0.505009	1.33999e-25	postive
IFI30	AC016773.1	0.486169	1.3905e-23	postive
TMSB10	AC016773.1	0.429674	3.09935e-18	postive
LMBR1L	AC016773.1	0.56763	2.7818e-33	postive
IRF3	AC016773.1	0.505482	1.18805e-25	postive
IKBKE	AC016773.1	0.53499	4.45471e-29	postive
CACYBP	AC016773.1	0.419787	2.13245e-17	postive
MAPK3	AC016773.1	0.431436	2.18316e-18	postive
SRC	AC016773.1	0.408901	1.65855e-16	postive
EED	AC016773.1	0.490108	5.39428e-24	postive
SYTL1	AC016773.1	0.486266	1.35867e-23	postive
MAP2K2	AC016773.1	0.410905	1.14331e-16	postive
HDAC1	AC016773.1	0.407126	2.30104e-16	postive
BIRC5	AC016773.1	0.556165	9.42273e-32	postive
AGER	AC016773.1	0.643228	4.68672e-45	postive
HRAS	AC016773.1	0.454641	1.77783e-20	postive
NFKBIE	AC016773.1	0.467101	1.14927e-21	postive
PIK3R2	AC016773.1	0.471831	3.94394e-22	postive
[truncated: 3,874 more rows]
